# Supplementary material for: Exercise-induced enhancement of synaptic function triggered by the inverse BAR protein, Mtss1L
Source: eLife journal article supplement (doi:10.7554/elife.45920), 2019-06-24
Supplement: supp [file elife-45920-supp-v1.zip]

Archive with 14 entries (14 files):
- elife_poa_e45920_Supplementary_file_4.docx
- elife_poa_e45920_Figure_3_figure_supplement_1.tif
- elife_poa_e45920_Figure_1_figure_supplement_1.tif
- elife_poa_e45920_Figure_6_figure_supplement_1.tif
- elife_poa_e45920_Transparent_Reporting_File.pdf
- elife_poa_e45920_Supplementary_file_3.xls
- elife_poa_e45920_Figure_2_figure_supplement_1.psd
- elife_poa_e45920_Supplementary_file_1.docx
- elife_poa_e45920_Figure_2_figure_supplement_2.psd
- elife_poa_e45920_Figure_3_figure_supplement_2.tif
- elife_poa_e45920_Figure_5_figure_supplement_1.psd
- elife_poa_e45920_Supplementary_file_2.xlsx
- elife_poa_e45920_Figure_6_figure_supplement_2.psd
- elife_poa_e45920_Figure_3_figure_supplement_3.psd
