# Supplementary material for: Exercise-induced enhancement of synaptic function triggered by the inverse BAR protein, Mtss1L
Source: eLife journal article supplement (doi:10.7554/elife.45920), 2019-06-24
Supplement: supp [file elife-45920-supp-v1.zip › elife_poa_e45920_Supplementary_file_3.xls]

## Sheet: Galaxy295-(DESeq2_result_file_o
gene_id	baseMean	log2FoldChange	pvalue	padj
Ifi27	541.145	-1.02452	7.39121e-11	4.27655e-07
Mdk	154.055	-1.06476	2.70771e-10	7.8334e-07
Mbp	2049.95	-0.833924	5.9793e-09	1.15321e-05
Resp18	108.601	-0.916109	8.31909e-08	9.62685e-05
Timp2	100.267	-0.929627	8.19999e-08	9.62685e-05
Rab3b	73.5518	-0.841563	4.70709e-07	0.00045392
Nap1l5	595.628	-0.620817	5.17768e-05	0.0427972
Rgs10	185.143	-0.692561	7.20888e-05	0.0521382
Cox6b2	92.5125	-0.65169	0.000112916	0.0725927
Rpp25	54.6902	-0.614721	0.00013382	0.0774281
Lgals1	59.535	-0.572372	0.000162323	0.0853821
Id3	127.202	-0.625368	0.000219111	0.0975212
Sst	1501.15	-0.442645	0.000212883	0.0975212
Acot7	1438.88	-0.538452	0.000396285	0.163779
Rasl11a	59.8818	-0.588251	0.000589636	0.227442
Abat	175.261	-0.584651	0.000804056	0.245892
Hmgb3	89.1837	-0.588539	0.000690678	0.245892
Lrrc57	723.323	0.420314	0.000807301	0.245892
Tbc1d9b	238.077	-0.583249	0.000807459	0.245892
Lhx6	61.2028	-0.517476	0.000873001	0.252559
Mobp	66.409	-0.554545	0.00103802	0.278979
Sema6c	72.597	-0.526225	0.00106076	0.278979
Cend1	479.187	-0.468404	0.00113203	0.284778
Clu	719.157	-0.420923	0.00124412	0.290244
Fxyd1	303.316	-0.466634	0.00145473	0.290244
Mea1	1108.26	-0.408521	0.00135672	0.290244
Pmp22	219.831	-0.554236	0.00142688	0.290244
Tomm40	565.622	-0.440703	0.00126279	0.290244
Zmym6	90.6982	0.555632	0.00132472	0.290244
Enho	163.751	-0.548738	0.00154894	0.298739
Id4	92.9195	-0.546109	0.00166834	0.311387
Baiap2	1274.25	0.419185	0.00188718	0.333952
Phactr1	351.389	0.437528	0.00190467	0.333952
Cuta	589.84	-0.409853	0.0019774	0.336506
Prdx6	756.768	-0.409541	0.00208169	0.344133
Calm3	1583.34	0.453139	0.00233191	0.36466
Cotl1	278.196	0.452348	0.00233157	0.36466
Mir678	130.206	-0.522534	0.00241454	0.367645
Aqp4	180.394	-0.511976	0.00258401	0.383361
Hsd11b1	129.143	-0.521075	0.00282144	0.408122
Bcat1	61.2968	-0.468401	0.00315997	0.415536
Ddn	210.167	0.497902	0.00302992	0.415536
Rasl10a	829.065	0.448315	0.00310206	0.415536
Ugp2	93.8288	-0.516379	0.00306733	0.415536
Gstm1	537.103	-0.39865	0.00349218	0.449017
Bok	197.822	-0.499142	0.00372133	0.468079
Gsn	89.0383	-0.495033	0.00429826	0.507546
Il34	64.3631	-0.475266	0.00414272	0.507546
Nrsn1	449.266	-0.470706	0.00426566	0.507546
Lnx1	61.5928	-0.468237	0.00501389	0.580207
C1ql2	1610.17	0.376052	0.00568281	0.631234
Hmga1	647.254	-0.407139	0.00567832	0.631234
Mef2a	528.376	0.36422	0.00578213	0.631234
Gng12	177.703	-0.438251	0.00599388	0.63444
Pdcd4	208.136	0.434402	0.0060308	0.63444
Camk1	138.724	-0.471986	0.00630239	0.651172
Npy	1325.76	-0.303559	0.00676642	0.672078
Phyhip	225.152	0.43638	0.00685319	0.672078
Tmem218	79.4788	-0.472053	0.00682699	0.672078
Camk2a	625.638	0.429411	0.00698711	0.67379
Ssx2ip	551.22	0.360211	0.00728943	0.69142
Olfm2	58.1872	-0.416335	0.00812302	0.746029
Sema6d	289.049	-0.386523	0.00809346	0.746029
Gprasp2	227.527	-0.405057	0.00847836	0.756195
Nrgn	9093.98	0.327804	0.00849511	0.756195
Acsbg1	74.7998	-0.436551	0.00907094	0.760644
Csrp1	95.1863	-0.455515	0.00904276	0.760644
Egr3	273.219	0.39773	0.00884192	0.760644
Gsr	100.732	0.446607	0.00888536	0.760644
Cib1	95.8949	-0.453389	0.00927947	0.767015
Ubtf	591.435	0.34606	0.00959593	0.782
Jun	371.378	0.384108	0.00973275	0.782134
Cdc7	59.1596	0.441132	0.0102567	0.801963
Fgf12	100.097	-0.442967	0.0101499	0.801963
Scyl3	76.6288	0.444778	0.0106754	0.823575
Cebpd	220.04	0.416051	0.0111758	0.844413
Coprs	116.172	-0.431095	0.0112374	0.844413
Bhlhe22	137.345	0.421722	0.0117974	0.85325
Stau2	246.015	-0.396939	0.0116846	0.85325
Tmem179	231.444	-0.406224	0.0117201	0.85325
Arntl	84.1098	0.43564	0.0122969	0.857229
Mknk1	229.243	0.382602	0.0121829	0.857229
Syngr3	490.557	-0.360813	0.0120315	0.857229
Tubb4b	452.235	-0.377776	0.01256	0.865146
Ackr3	126.71	-0.408071	0.0146474	0.925336
Arhgdib	83.9015	0.410972	0.0136439	0.925336
Ccdc136	92.0638	-0.425415	0.0143893	0.925336
Itpka	1013.45	0.304757	0.0141673	0.925336
Sowaha	260.633	0.363396	0.0147133	0.925336
Tanc1	182.433	0.395478	0.014091	0.925336
Thra	155.617	0.414733	0.0141706	0.925336
Uba1	973.682	-0.308983	0.0146517	0.925336
Mid1ip1	227.505	-0.395982	0.0149253	0.92858
Rbfox3	2151.02	0.288598	0.0161892	0.996498
42431	270.642	-0.287197	0.064351	0.999939
42434	197.138	0.104923	0.501346	0.999939
42436	74.8484	0.150243	0.389105	0.999939
42437	94.1928	-0.407982	0.0193914	0.999939
42615	82.8147	0.153677	0.377479	0.999939
42616	536.475	0.0820449	0.528636	0.999939
42617	304.738	-0.121635	0.43416	0.999939
42618	406.88	0.259947	0.0566861	0.999939
42619	63.0127	-0.256413	0.121247	0.999939
42620	1110.36	0.00548175	0.964851	0.999939
42621	181.629	-0.0494723	0.757352	0.999939
42622	79.1409	0.122046	0.47955	0.999939
42624	62.3042	-0.0116411	0.946626	0.999939
42628	949.444	-0.0187274	0.886981	0.999939
0610007P14Rik	286.795	-0.0113058	0.938966	0.999939
0610009B22Rik	183.964	0.0668984	0.692849	0.999939
0610010K14Rik	879.078	0.260443	0.0537532	0.999939
0610011F06Rik	166.082	-0.18815	0.245818	0.999939
0610012G03Rik	247.922	-0.0114361	0.941201	0.999939
0610037L13Rik	128.876	0.0591426	0.728799	0.999939
1110001J03Rik	297.419	0.103054	0.538523	0.999939
1110004E09Rik	188.997	-0.0338826	0.829786	0.999939
1110004F10Rik	683.569	-0.0849331	0.506028	0.999939
1110008F13Rik	329.79	-0.0589969	0.684693	0.999939
1110008P14Rik	454.012	-0.254369	0.0881534	0.999939
1110032A03Rik	69.0695	-0.156336	0.370135	0.999939
1110038B12Rik	69.6073	-0.000279176	0.99869	0.999939
1110038F14Rik	137.489	0.00134378	0.993643	0.999939
1110051M20Rik	266.329	0.0712869	0.634918	0.999939
1110059E24Rik	160.609	0.251565	0.131671	0.999939
1110065P20Rik	343.348	-0.0801915	0.582444	0.999939
1190007I07Rik	209.591	-0.090354	0.58945	0.999939
1500009C09Rik	75.7289	0.00244698	0.988812	0.999939
1500009L16Rik	81.0296	-0.298511	0.0859692	0.999939
1500011B03Rik	438.48	0.0334706	0.805911	0.999939
1500011K16Rik	311.816	0.0972662	0.533385	0.999939
1500012F01Rik	90.3825	-0.072759	0.67571	0.999939
1600012H06Rik	136.881	0.319395	0.0534944	0.999939
1600014C10Rik	120.476	-0.172733	0.305273	0.999939
1600020E01Rik	92.1136	0.0579764	0.738124	0.999939
1700010K23Rik	111.937	0.134804	0.430278	0.999939
1700019D03Rik	54.4672	-0.0231114	0.881823	0.999939
1700020I14Rik	227.634	0.2199	0.185824	0.999939
1700021F05Rik	152.161	-0.201937	0.221387	0.999939
1700021K19Rik	57.4299	-0.0735849	0.622525	0.999939
1700037H04Rik	128.366	-0.185308	0.280792	0.999939
1700086L19Rik	282.428	0.263377	0.0828753	0.999939
1700123O20Rik	54.8885	0.132485	0.433299	0.999939
1810009A15Rik	220.336	-0.0967724	0.534564	0.999939
1810022K09Rik	326.84	0.218226	0.201269	0.999939
1810026J23Rik	200.071	0.112012	0.477081	0.999939
1810037I17Rik	168.375	0.0129719	0.937677	0.999939
1810041L15Rik	82.1774	0.104257	0.549517	0.999939
1810043G02Rik	105.706	0.00628446	0.970481	0.999939
1810043H04Rik	143.315	-0.040285	0.808788	0.999939
1810055G02Rik	72.9048	0.0738452	0.671435	0.999939
1810058I24Rik	142.508	-0.0687766	0.675942	0.999939
2010012O05Rik	65.4325	0.047455	0.78523	0.999939
2010107E04Rik	1242.17	-0.180101	0.253993	0.999939
2010107G23Rik	106.634	-0.0607214	0.722552	0.999939
2010204K13Rik	329.378	0.107124	0.525742	0.999939
2010300C02Rik	961.505	0.225825	0.0719493	0.999939
2010315B03Rik	55.9121	-0.128117	0.438855	0.999939
2210013O21Rik	182.19	-0.0360305	0.820892	0.999939
2210015D19Rik	55.8076	-0.0366425	0.831469	0.999939
2210016L21Rik	426.48	0.111137	0.411628	0.999939
2210408F21Rik	92.4869	-0.107798	0.530835	0.999939
2300009A05Rik	205.991	0.191051	0.24371	0.999939
2310009A05Rik	139.404	0.0894201	0.603197	0.999939
2310009B15Rik	91.4203	-0.0663165	0.703442	0.999939
2310011J03Rik	123.805	-0.0519787	0.755832	0.999939
2310022A10Rik	58.5255	-0.00116332	0.994642	0.999939
2310033P09Rik	59.9735	-0.139247	0.421419	0.999939
2310035C23Rik	77.8459	-0.0649279	0.709689	0.999939
2310036O22Rik	350.817	0.180682	0.227255	0.999939
2310045N01Rik	141.982	-0.1323	0.436108	0.999939
2310057M21Rik	66.7166	-0.120333	0.490248	0.999939
2310061I04Rik	110.166	0.00357239	0.983283	0.999939
2410002F23Rik	212.918	0.0473445	0.759844	0.999939
2410004B18Rik	168.137	0.00243571	0.988026	0.999939
2410006H16Rik	123.774	-0.00386373	0.982062	0.999939
2410015M20Rik	288.637	-0.0704212	0.663693	0.999939
2410016O06Rik	62.4876	-0.156508	0.368343	0.999939
2510002D24Rik	86.2555	0.33425	0.0533858	0.999939
2510039O18Rik	66.6388	0.0117327	0.946331	0.999939
2610001J05Rik	142.668	0.109233	0.523909	0.999939
2610035D17Rik	67.2855	0.131286	0.451324	0.999939
2610301B20Rik	169.289	0.182704	0.253816	0.999939
2610507B11Rik	76.0893	0.0587071	0.736438	0.999939
2610524H06Rik	167.589	0.137145	0.418525	0.999939
2700029M09Rik	265.768	0.013729	0.927713	0.999939
2700060E02Rik	303.727	0.0867201	0.559196	0.999939
2700062C07Rik	107.285	0.12374	0.472338	0.999939
2700094K13Rik	146.632	-0.0936009	0.586418	0.999939
2810001G20Rik	58.4934	-0.0130289	0.939945	0.999939
2810013P06Rik	60.1171	-0.0531285	0.758794	0.999939
2810025M15Rik	261.985	-0.0267071	0.867441	0.999939
2810403A07Rik	86.6204	0.17515	0.312031	0.999939
2810428I15Rik	331.774	0.0161732	0.919681	0.999939
2900011O08Rik	490.473	-0.0153161	0.908091	0.999939
2900055J20Rik	149.277	0.345108	0.0409229	0.999939
2900097C17Rik	378.236	-0.0960986	0.519787	0.999939
3010026O09Rik	108.878	-0.0647981	0.705499	0.999939
3110002H16Rik	83.4544	-0.173238	0.320606	0.999939
3110035E14Rik	83.2091	-0.0372959	0.830732	0.999939
3110040N11Rik	54.8466	-0.0813332	0.635971	0.999939
3110082I17Rik	73.7085	0.0457438	0.7927	0.999939
3300002P13Rik	54.9841	0.0117507	0.942459	0.999939
3830406C13Rik	261.651	0.0639633	0.680119	0.999939
4833420G17Rik	117.349	0.0442107	0.794503	0.999939
4833439L19Rik	1902.84	0.0270089	0.834492	0.999939
4921524J17Rik	266.268	0.123978	0.425732	0.999939
4930453N24Rik	63.504	-0.0111257	0.949014	0.999939
4930473A02Rik	121.461	-0.0991251	0.557163	0.999939
4930506C21Rik	82.6092	-0.0644951	0.71057	0.999939
4930526I15Rik	60.7582	-0.0696269	0.68204	0.999939
4930549G23Rik	57.3757	-0.079588	0.643877	0.999939
4931428F04Rik	58.8203	-0.159283	0.356119	0.999939
4933434E20Rik	229.568	-0.0129096	0.933494	0.999939
4933439C10Rik	55.4408	-0.0361517	0.833635	0.999939
5730455P16Rik	91.509	0.0434274	0.801491	0.999939
6330403K07Rik	415.957	0.00368097	0.979454	0.999939
6430548M08Rik	248.072	-0.304685	0.078863	0.999939
8430419L09Rik	242.668	0.153181	0.308669	0.999939
9030624J02Rik	117.226	0.306015	0.0681953	0.999939
9130221H12Rik	93.2603	0.0455474	0.792582	0.999939
9130401M01Rik	205.44	0.157277	0.311084	0.999939
9430016H08Rik	73.8896	0.128185	0.462408	0.999939
9530068E07Rik	249.076	0.0121514	0.93818	0.999939
9530082P21Rik	109.135	-0.0246816	0.884494	0.999939
A230050P20Rik	129.336	-0.0428545	0.800038	0.999939
A230070E04Rik	198.344	-0.060036	0.728821	0.999939
A330009N23Rik	134.252	0.166257	0.326349	0.999939
A330050F15Rik	78.7569	-0.00857878	0.960767	0.999939
A430005L14Rik	266.512	0.052174	0.724624	0.999939
A730017C20Rik	402.571	0.240489	0.140258	0.999939
A830010M20Rik	88.5598	0.0875859	0.612887	0.999939
A830018L16Rik	122.762	0.212797	0.208642	0.999939
A930005H10Rik	85.3315	0.00880639	0.959753	0.999939
Aagab	231.651	0.0239675	0.877129	0.999939
Aamdc	484.772	0.0575255	0.706276	0.999939
Aamp	1084.35	-0.0550788	0.653835	0.999939
Aar2	122.258	-0.0758174	0.660694	0.999939
Aars	163.451	-0.0747856	0.662382	0.999939
Aarsd1	216.008	0.044829	0.77239	0.999939
Aasdhppt	60.2451	0.147489	0.39428	0.999939
Aatk	278.195	0.0549886	0.736463	0.999939
Abcb10	84.3693	0.119597	0.490993	0.999939
Abcb8	63.8219	-0.263735	0.129497	0.999939
Abcc8	55.9776	-0.0754554	0.659862	0.999939
Abcd3	59.6439	0.06422	0.707863	0.999939
Abce1	130.45	0.0847457	0.609782	0.999939
Abcf1	81.6946	0.0516175	0.766234	0.999939
Abcf2	320.855	0.105288	0.483494	0.999939
Abcf3	110.628	0.012197	0.94261	0.999939
Abcg4	69.7692	-0.206148	0.236002	0.999939
Abhd10	117.38	-0.0938951	0.582683	0.999939
Abhd11	172.806	-0.143378	0.385881	0.999939
Abhd12	849.331	0.0345531	0.788603	0.999939
Abhd13	95.2736	-0.12764	0.457229	0.999939
Abhd14a	248.997	-0.0112084	0.945081	0.999939
Abhd16a	297.014	-0.1011	0.492224	0.999939
Abhd17a	562.337	0.0590913	0.659233	0.999939
Abhd17b	69.6658	-0.100778	0.563607	0.999939
Abhd17c	325.202	0.268296	0.0720239	0.999939
Abhd4	144.931	-0.146449	0.399009	0.999939
Abhd6	190.904	-0.119882	0.448298	0.999939
Abhd8	474.328	-0.0606386	0.675095	0.999939
Abi1	1344.08	0.0656829	0.596062	0.999939
Abi2	519.534	0.0579257	0.683912	0.999939
Ablim1	206.028	0.116829	0.462113	0.999939
Ablim2	632.14	0.0181377	0.907316	0.999939
Ablim3	106.41	-0.0695144	0.687671	0.999939
Abr	2043.5	-0.0137045	0.907456	0.999939
Abtb1	70.0097	-0.0254388	0.884101	0.999939
Acaa1a	128.183	-0.155931	0.359401	0.999939
Acadm	63.4069	-0.205208	0.237582	0.999939
Acadsb	58.9847	-0.122406	0.473996	0.999939
Acadvl	84.653	-0.235284	0.177564	0.999939
Acap3	128.464	-0.073179	0.670375	0.999939
Acat1	150.942	-0.107505	0.513658	0.999939
Acat2	59.6462	-0.173977	0.306408	0.999939
Acat3	62.423	0.0117364	0.946166	0.999939
Acbd4	64.1207	-0.0124646	0.942812	0.999939
Acbd5	176.901	-0.109148	0.5307	0.999939
Acbd6	298.243	-0.0173116	0.919413	0.999939
Acd	127.734	-0.168041	0.311554	0.999939
Ache	138.531	-0.165836	0.219243	0.999939
Acin1	69.1334	0.246716	0.156058	0.999939
Acly	215.568	-0.260118	0.106833	0.999939
Aco2	653.463	-0.0530686	0.69386	0.999939
Acot13	1091.59	0.0713242	0.626821	0.999939
Acot5	65.4389	0.195276	0.262192	0.999939
Acot9	67.649	-0.258059	0.137944	0.999939
Acox1	188.543	-0.177394	0.298695	0.999939
Acp1	191.095	0.112977	0.481705	0.999939
Acp2	58.3986	-0.0654531	0.704935	0.999939
Acsl1	99.154	-0.0914912	0.592215	0.999939
Acsl3	554.127	-0.102673	0.437859	0.999939
Acsl4	110.537	0.00191288	0.990981	0.999939
Acsl5	93.1451	0.108225	0.529672	0.999939
Acsl6	414.921	-0.164375	0.328206	0.999939
Acta1	99.5469	0.130487	0.452287	0.999939
Actb	1889.22	0.205026	0.077428	0.999939
Actg1	743.155	-0.0346122	0.799561	0.999939
Actl6b	406.849	0.0431368	0.755114	0.999939
Actn4	139.182	0.0744651	0.652883	0.999939
Actr10	114.81	0.0017677	0.991619	0.999939
Actr1a	221.065	0.0176213	0.912244	0.999939
Actr1b	517.061	0.00974811	0.940513	0.999939
Actr2	147.169	0.0320791	0.844424	0.999939
Actr3	1409.65	0.105348	0.362684	0.999939
Actr3b	366.086	0.100552	0.484497	0.999939
Actr6	88.7398	-0.0105325	0.951381	0.999939
Actr8	142.419	0.0657044	0.693235	0.999939
Acvr1	123.69	0.110207	0.523272	0.999939
Acyp1	187.892	-0.142432	0.385452	0.999939
Acyp2	118.218	-0.0769973	0.656208	0.999939
Adal	88.7501	-0.00838619	0.961441	0.999939
Adam11	136.533	0.00162825	0.992228	0.999939
Adam15	129.207	-0.0216415	0.900753	0.999939
Adam22	71.3605	-0.192219	0.270222	0.999939
Adam9	101.109	-0.0866042	0.619639	0.999939
Adap1	218.17	0.038998	0.801607	0.999939
Adar	177.394	0.119907	0.476545	0.999939
Adarb1	110.957	-0.0488108	0.777285	0.999939
Adarb2	67.8816	0.0273555	0.873985	0.999939
Adck1	206.812	-0.122485	0.448226	0.999939
Adck3	154.874	0.26965	0.120141	0.999939
Adck5	82.6101	-0.140403	0.419271	0.999939
Adcy1	167.334	0.267122	0.122954	0.999939
Adcy2	192.509	0.242688	0.122385	0.999939
Adcy3	99.8832	-0.173325	0.320608	0.999939
Adcyap1r1	204.365	-0.0491237	0.76538	0.999939
Add1	954.927	0.142327	0.252239	0.999939
Add2	541.048	0.375017	0.0186703	0.999939
Add3	491.612	-0.190718	0.171941	0.999939
Adgrb2	588.114	0.241089	0.101732	0.999939
Adgrb3	74.7792	0.0838196	0.630697	0.999939
Adh5	363.216	-0.134792	0.348271	0.999939
Adi1	67.4305	-0.0792256	0.649731	0.999939
Adipor1	216.497	-0.140893	0.393703	0.999939
Adk	382.424	0.0249492	0.863679	0.999939
Adnp	74.8213	0.125118	0.473314	0.999939
Adora1	524.33	-0.000970772	0.994832	0.999939
Adprh	295.155	0.0474094	0.744511	0.999939
Adprhl2	129.036	-0.164818	0.328623	0.999939
Adra2c	59.1871	0.065976	0.703473	0.999939
Adrbk1	221.896	0.0322334	0.849232	0.999939
Adrm1	218.371	-0.0537568	0.73286	0.999939
Adss	92.2704	0.0787002	0.650366	0.999939
Aebp2	62.6853	0.242793	0.162228	0.999939
Aen	54.4821	-0.242214	0.140722	0.999939
Aes	4147.73	0.104856	0.330423	0.999939
Afap1l2	57.7193	-0.0400521	0.81548	0.999939
Afg3l1	55.9732	-0.0516969	0.762487	0.999939
Afg3l2	122.127	-0.0619094	0.712256	0.999939
Aftph	151.327	0.130675	0.4372	0.999939
Agap3	500.397	0.198562	0.150464	0.999939
Agfg2	398.558	-0.109915	0.459155	0.999939
Aggf1	89.8479	0.0260939	0.879676	0.999939
Agk	64.1066	-0.158857	0.356206	0.999939
Agpat1	115.065	0.0340108	0.840277	0.999939
Agpat3	75.9385	-0.0835026	0.632261	0.999939
Agpat4	136.44	0.0144698	0.930189	0.999939
Agpat5	68.6446	-0.0403772	0.816986	0.999939
Agpat6	90.3488	-0.0268805	0.877026	0.999939
Agtpbp1	286.044	0.204045	0.182751	0.999939
Ahcyl1	321.28	-0.0172788	0.906169	0.999939
Ahcyl2	802.625	-0.00655912	0.966744	0.999939
Ahi1	260.419	0.277469	0.0825991	0.999939
Ahsa1	417.631	0.115063	0.432838	0.999939
Ahsa2	91.0124	-0.190276	0.273183	0.999939
AI413582	258.04	-0.208731	0.166002	0.999939
AI593442	324.142	-0.0537667	0.721617	0.999939
AI837181	212.506	-0.00358597	0.982292	0.999939
AI854517	122.857	-0.0345506	0.842812	0.999939
Aifm1	119.439	-0.0437471	0.799918	0.999939
Aig1	99.6491	0.028482	0.868101	0.999939
Aimp1	176.201	0.0400577	0.816637	0.999939
Aimp2	260.968	-0.157246	0.296114	0.999939
Aip	418.595	-0.0665543	0.628258	0.999939
Ajap1	86.8322	-0.197961	0.252889	0.999939
AK010878	62.0163	0.107529	0.529988	0.999939
Ak1	792.715	0.00848635	0.948921	0.999939
Ak2	75.2808	-0.0238856	0.891132	0.999939
Ak3	86.8277	-0.0944072	0.584814	0.999939
Ak5	556.043	-0.0243937	0.860016	0.999939
Ak6	120.683	-0.0239084	0.890415	0.999939
Akap1	85.3055	0.0142099	0.934815	0.999939
Akap7	113.891	0.138149	0.416502	0.999939
Akap8	130.287	0.0897899	0.600522	0.999939
Akap8l	146.854	-0.0299756	0.855714	0.999939
Akirin1	176.773	0.028196	0.863633	0.999939
Akirin2	179.082	0.163775	0.307121	0.999939
Akr1a1	1042.96	-0.0808008	0.530991	0.999939
Akr1b3	102.327	0.0342871	0.840747	0.999939
Akr1e1	89.8863	0.114332	0.507792	0.999939
Akr7a5	85.0828	0.0115726	0.94705	0.999939
Akt1	579.937	-0.096017	0.544189	0.999939
Akt1s1	412.627	0.0722256	0.632224	0.999939
Akt2	130.414	0.00943178	0.955919	0.999939
Aktip	705.259	-0.0834892	0.583549	0.999939
Alad	71.273	0.108185	0.535227	0.999939
Alas1	236.983	-0.0214131	0.893465	0.999939
Aldh1a1	55.3042	-0.00383791	0.980198	0.999939
Aldh2	60.1158	0.0573096	0.739386	0.999939
Aldh7a1	61.6026	-0.0949271	0.583323	0.999939
Aldoa	17686	0.0302757	0.792744	0.999939
Aldoc	786.511	-0.141837	0.31995	0.999939
Alg1	93.1287	-0.0458948	0.790747	0.999939
Alg11	61.6188	0.173567	0.317373	0.999939
Alg2	199.38	-0.232677	0.145737	0.999939
Alg5	99.8989	-0.0759182	0.658306	0.999939
Alg9	65.4825	0.00398882	0.981697	0.999939
Alkbh6	233.912	-0.0425607	0.788075	0.999939
Alkbh7	111.557	0.168148	0.32058	0.999939
Als2	105.463	-0.109228	0.523115	0.999939
Alyref	251.879	-0.0513945	0.742071	0.999939
Amdhd2	69.7708	-0.106458	0.541368	0.999939
Amer2	153.479	0.199832	0.230702	0.999939
Amer3	68.1744	0.0175802	0.919751	0.999939
Amfr	315.164	-0.0874437	0.544412	0.999939
Amigo1	173.9	0.0661814	0.68105	0.999939
Amigo2	118.921	-0.013751	0.908068	0.999939
Amn1	85.1045	-0.128946	0.459933	0.999939
Ampd2	370.187	0.00480433	0.975665	0.999939
Amph	319.612	-0.0127104	0.933833	0.999939
Anapc11	172.258	-0.11251	0.486666	0.999939
Anapc13	237.114	-0.0580083	0.726751	0.999939
Anapc15	131.981	-0.18042	0.301185	0.999939
Anapc16	247.336	0.167207	0.266673	0.999939
Anapc2	110.546	-0.150664	0.37294	0.999939
Anapc4	78.0897	-0.0867015	0.618817	0.999939
Anapc5	1373.5	0.0771827	0.57293	0.999939
Angel2	324.644	0.0579329	0.723619	0.999939
Angptl6	79.8096	-0.0363145	0.834912	0.999939
Ank	190.048	0.14479	0.359949	0.999939
Ank2	147.116	-0.0573929	0.740142	0.999939
Ank3	261.847	0.207695	0.214529	0.999939
Ankib1	62.0525	-0.242427	0.161964	0.999939
Ankle2	65.6008	-0.0102213	0.953224	0.999939
Ankmy2	130.078	-0.0161724	0.922513	0.999939
Ankra2	347.29	0.266117	0.068179	0.999939
Ankrd10	102.33	0.272556	0.118304	0.999939
Ankrd11	139.464	0.123112	0.464621	0.999939
Ankrd13a	95.0984	-0.1772	0.306294	0.999939
Ankrd13c	65.1652	-0.111389	0.522351	0.999939
Ankrd13d	78.5727	-0.066174	0.704024	0.999939
Ankrd34a	107.653	0.0879469	0.606197	0.999939
Ankrd40	129.899	0.0915722	0.580671	0.999939
Ankrd45	121.962	0.0694548	0.680391	0.999939
Ankrd46	860.057	0.0996327	0.422967	0.999939
Ankrd49	55.9275	-0.0660202	0.70099	0.999939
Ankrd6	156.116	0.163211	0.32997	0.999939
Anks1b	462.328	0.185986	0.16307	0.999939
Anks3	74.292	-0.23648	0.175187	0.999939
Ankzf1	61.3125	0.322044	0.058791	0.999939
Ano3	99.5206	0.140822	0.415637	0.999939
Anp32a	77.8315	0.370539	0.0335837	0.999939
Anp32b	193.322	-0.0919744	0.558778	0.999939
Anp32e	341.18	-0.104373	0.491976	0.999939
Anxa11	62.4998	0.145113	0.40348	0.999939
Anxa6	623.726	0.0842595	0.52604	0.999939
Anxa7	101.213	-0.0640137	0.713644	0.999939
Ap1ar	238.95	0.0944917	0.544498	0.999939
Ap1b1	294.287	-0.0678292	0.673429	0.999939
Ap1g1	72.4004	-0.125752	0.471141	0.999939
Ap1m1	184.478	0.0590702	0.709627	0.999939
Ap1s1	745.809	-0.0689443	0.615071	0.999939
Ap1s2	199.026	0.115728	0.478693	0.999939
Ap2a1	551.405	-0.0901787	0.496491	0.999939
Ap2a2	190.251	-0.0316176	0.844619	0.999939
Ap2m1	1042.95	-0.0719514	0.590469	0.999939
Ap2s1	741.956	-0.134863	0.274649	0.999939
Ap3b1	92.7813	0.189883	0.269129	0.999939
Ap3b2	160.499	-0.159711	0.333216	0.999939
Ap3d1	122.694	-0.0522352	0.758105	0.999939
Ap3m2	286.136	0.106113	0.493976	0.999939
Ap3s1	207.886	-0.0771113	0.61867	0.999939
Ap4b1	69.2953	0.132421	0.447329	0.999939
Ap4s1	186.339	-0.049964	0.76131	0.999939
Ap5s1	268.165	-0.153508	0.300299	0.999939
Apba2	537.956	-0.130761	0.324785	0.999939
Apbb1	1698.12	-0.121841	0.391756	0.999939
Apbb2	152.913	-0.206714	0.217391	0.999939
Apbb3	77.6335	-0.0120335	0.944998	0.999939
Apex1	278.704	0.0451377	0.76544	0.999939
Api5	342.331	0.0683279	0.65336	0.999939
Apip	67.9064	-0.176793	0.310997	0.999939
Aplp1	3593.72	0.105329	0.320168	0.999939
Aplp2	1372.74	-0.200999	0.0998321	0.999939
Apmap	145.052	-0.122561	0.457659	0.999939
Apoa1bp	321.702	-0.0841014	0.56524	0.999939
Apod	156.886	0.0943785	0.324715	0.999939
Apoe	8237.27	-0.27234	0.116324	0.999939
Apoo	599.791	-0.0499126	0.754267	0.999939
Apoo-ps	197.86	-0.0473461	0.780351	0.999939
Apopt1	198.438	0.00577941	0.971355	0.999939
App	3892.02	-0.144253	0.260407	0.999939
Appbp2	103.08	0.082578	0.627953	0.999939
Aprt	273.762	-0.042411	0.785018	0.999939
Aptx	60.2101	-0.0446569	0.796874	0.999939
Araf	487.497	-0.174582	0.21191	0.999939
Arc	177.441	-0.138449	0.324222	0.999939
Arcn1	181.378	0.0112388	0.945194	0.999939
Arel1	76.8171	-0.0114861	0.947466	0.999939
Arf1	2292.49	0.00367379	0.973061	0.999939
Arf2	173.276	-0.0802704	0.617575	0.999939
Arf3	1313.24	0.229196	0.0497001	0.999939
Arf4	544.088	0.133302	0.346598	0.999939
Arf5	1263.43	0.0769703	0.50228	0.999939
Arf6	55.432	-0.0200082	0.906381	0.999939
Arfgap1	997.642	-0.0244193	0.840781	0.999939
Arfgap2	253.72	-0.0202109	0.89492	0.999939
Arfip2	106.004	0.0328848	0.847346	0.999939
Arfrp1	340.022	-0.243809	0.0841788	0.999939
Arglu1	113.815	0.135741	0.422407	0.999939
Arhgap1	396.733	-0.111109	0.439507	0.999939
Arhgap12	100.538	0.110383	0.517739	0.999939
Arhgap15	108.625	-0.0501138	0.700204	0.999939
Arhgap17	73.0011	0.299179	0.0848407	0.999939
Arhgap20	70.3406	0.172042	0.323946	0.999939
Arhgap21	130.845	0.0641234	0.703226	0.999939
Arhgap39	156.461	0.0753039	0.650321	0.999939
Arhgap44	177.261	0.122586	0.446954	0.999939
Arhgdia	374.503	0.034524	0.811539	0.999939
Arhgdig	161.699	-0.15981	0.209399	0.999939
Arhgef1	164.961	-0.16095	0.356331	0.999939
Arhgef10l	100.484	-0.188753	0.269212	0.999939
Arhgef2	526.554	0.178727	0.209246	0.999939
Arhgef25	654.007	0.148617	0.25694	0.999939
Arhgef3	419.815	0.164981	0.275105	0.999939
Arhgef4	532.236	0.096312	0.472661	0.999939
Arhgef7	66.9772	-0.11318	0.514459	0.999939
Arhgef9	463.101	0.235475	0.121773	0.999939
Arid4b	70.4669	0.17102	0.327074	0.999939
Arl1	571.418	0.187515	0.157175	0.999939
Arl14ep	55.2744	-0.052225	0.760064	0.999939
Arl16	74.2121	-0.12714	0.465693	0.999939
Arl2	253.532	-0.0809	0.594889	0.999939
Arl2bp	513.228	-0.280941	0.0671027	0.999939
Arl3	404.521	-0.00560445	0.968936	0.999939
Arl4a	74.4918	0.118357	0.497536	0.999939
Arl4d	68.5652	-0.134314	0.44118	0.999939
Arl5a	61.8374	-0.201568	0.243404	0.999939
Arl6	110.894	0.127638	0.450559	0.999939
Arl6ip1	895.705	-0.183877	0.141999	0.999939
Arl6ip4	144.891	0.0894218	0.586447	0.999939
Arl6ip5	370.173	0.131848	0.356417	0.999939
Arl8a	758.258	0.0556904	0.679232	0.999939
Arl8b	397.545	-0.0157728	0.908625	0.999939
Armc1	217.505	0.200795	0.190546	0.999939
Armc6	83.935	0.100959	0.560111	0.999939
Armc8	87.7056	0.0527654	0.760377	0.999939
Armcx1	452.779	-0.314668	0.018943	0.999939
Armcx2	97.1975	-0.169577	0.321654	0.999939
Armcx5	57.2889	-0.0308107	0.855812	0.999939
Arpc1a	807.164	0.174134	0.156566	0.999939
Arpc2	1612.46	0.0926582	0.517493	0.999939
Arpc3	1020.57	0.0337845	0.800167	0.999939
Arpc4	1451.14	-0.00275913	0.98147	0.999939
Arpc5	708.015	0.0790631	0.563422	0.999939
Arpc5l	454.359	-0.110383	0.416056	0.999939
Arpp19	309.009	0.219048	0.129966	0.999939
Arpp21	221.484	0.0362329	0.82968	0.999939
Arrb2	367.561	0.304066	0.035234	0.999939
Arsb	179.096	-0.00623689	0.968891	0.999939
Arvcf	149.692	-0.0824413	0.618419	0.999939
Arxes1	147.694	0.014017	0.933422	0.999939
Arxes2	166.115	-0.144027	0.369227	0.999939
Asah1	67.7082	-0.167899	0.335827	0.999939
Asap1	97.2479	-0.327633	0.0600355	0.999939
Asb13	209.057	-0.0644808	0.686768	0.999939
Asb6	75.2321	-0.00145532	0.993341	0.999939
Asb8	353.741	-0.0610239	0.6752	0.999939
Ascc1	114.526	-0.0851906	0.617633	0.999939
Ash2l	165.592	0.0539487	0.743208	0.999939
Asic2	143.094	0.0959326	0.572402	0.999939
Asna1	143.647	-0.0286641	0.862486	0.999939
Asns	274.452	-0.0495077	0.762994	0.999939
Asnsd1	56.7182	-0.200001	0.24384	0.999939
Asph	175.292	0.116801	0.462245	0.999939
Asphd2	656.74	0.282431	0.0304749	0.999939
Aspscr1	284.132	-0.180518	0.2553	0.999939
Asrgl1	102.574	-0.0632181	0.716287	0.999939
Astn1	103.957	-0.200041	0.24197	0.999939
Atad1	195.205	0.102807	0.512669	0.999939
Atad3a	94.3466	-0.0550778	0.752278	0.999939
Atat1	155.375	-0.359251	0.0393474	0.999939
Atcay	160.925	0.024475	0.883879	0.999939
Ate1	289.146	-0.0606634	0.695451	0.999939
Atf2	653.246	-0.0731114	0.567822	0.999939
Atf4	332.259	-0.161192	0.257844	0.999939
Atf6b	203.902	0.00552632	0.972137	0.999939
Atg10	65.7577	-0.074452	0.665036	0.999939
Atg101	248.284	-0.0270234	0.867815	0.999939
Atg12	120.592	-0.000658786	0.996896	0.999939
Atg13	113.639	0.0488313	0.775951	0.999939
Atg16l1	307	-0.335308	0.0309713	0.999939
Atg3	173.643	-0.0598031	0.709746	0.999939
Atg4b	75.2534	0.118945	0.495485	0.999939
Atg4d	54.9118	-0.206676	0.227956	0.999939
Atg5	83.0084	-0.166045	0.338739	0.999939
Atg7	95.3711	-0.0132634	0.939193	0.999939
Atg9a	607.76	0.09716	0.476202	0.999939
Atl1	161.327	0.0293174	0.857372	0.999939
Atl2	189.514	0.029528	0.854153	0.999939
Atox1	448.413	-0.17992	0.229399	0.999939
Atp13a1	64.9348	-0.0526621	0.762443	0.999939
Atp13a2	258.953	-0.101249	0.549062	0.999939
Atp1a1	233.987	0.337232	0.0431798	0.999939
Atp1a2	67.5863	-0.29835	0.0861927	0.999939
Atp1a3	2392.04	-0.158703	0.225868	0.999939
Atp1b1	2915.56	-0.0882405	0.462114	0.999939
Atp1b2	159.273	-0.00584958	0.972248	0.999939
Atp1b3	160.969	-0.157842	0.333055	0.999939
Atp2a2	676.013	-0.0592262	0.648142	0.999939
Atp2b1	311.57	0.289504	0.0568568	0.999939
Atp2b2	463.853	0.0704011	0.608127	0.999939
Atp2c1	589.474	-0.189229	0.159747	0.999939
Atp5a1	1653.88	-0.140303	0.292518	0.999939
Atp5b	4266.83	-0.0326739	0.773832	0.999939
Atp5c1	1750.52	-0.132378	0.256347	0.999939
Atp5d	1158.18	-0.19695	0.110529	0.999939
Atp5e	980.657	-0.0516708	0.7367	0.999939
Atp5f1	2108.14	-0.122214	0.333427	0.999939
Atp5g1	1468.54	-0.12681	0.334971	0.999939
Atp5g2	186.879	0.190634	0.247787	0.999939
Atp5g3	8278.71	-0.0414283	0.706193	0.999939
Atp5h	1781.4	-0.0945126	0.484168	0.999939
Atp5j	7846.01	-0.0522331	0.703989	0.999939
Atp5j2	1216.56	-0.0252099	0.861756	0.999939
Atp5k	1203.34	0.0284661	0.859197	0.999939
Atp5l	816.941	0.00687907	0.964961	0.999939
Atp5o	1078.84	-0.134464	0.304803	0.999939
Atp5s	80.6464	0.0860366	0.620922	0.999939
Atp5sl	119.864	-0.0729139	0.664676	0.999939
Atp6ap1	676.995	-0.0936034	0.472195	0.999939
Atp6ap2	439.869	-0.175424	0.226688	0.999939
Atp6v0a1	1227.76	-0.132955	0.347133	0.999939
Atp6v0b	1416.01	-0.235204	0.0728764	0.999939
Atp6v0c	1475.65	-0.0728139	0.520417	0.999939
Atp6v0c-ps2	1507.13	-0.0744367	0.509265	0.999939
Atp6v0d1	335.749	0.0989417	0.490349	0.999939
Atp6v0e	199.706	-0.000560803	0.997134	0.999939
Atp6v0e2	1127.15	-0.0473539	0.723695	0.999939
Atp6v1a	795.924	0.0956024	0.474437	0.999939
Atp6v1b2	1140.02	-0.0573366	0.67213	0.999939
Atp6v1c1	821.399	-0.0301237	0.831411	0.999939
Atp6v1d	1270.97	0.0401422	0.748293	0.999939
Atp6v1e1	1720.88	-0.0466192	0.68463	0.999939
Atp6v1f	963.87	-0.0839846	0.509258	0.999939
Atp6v1g1	432.19	-0.16469	0.223378	0.999939
Atp6v1g2	1771.5	0.112226	0.331178	0.999939
Atp6v1h	398.836	-0.0452604	0.74426	0.999939
Atp8a1	283.232	0.061465	0.692397	0.999939
Atp9a	1057.16	-0.0705105	0.596193	0.999939
Atp9b	60.5401	-0.226648	0.190761	0.999939
Atpaf2	74.3616	0.0287559	0.869022	0.999939
Atpif1	626.922	-0.0190758	0.899218	0.999939
Atraid	1018.2	-0.080263	0.594718	0.999939
Atrip	59.5302	0.18222	0.28782	0.999939
Atxn10	714.526	-0.105041	0.447902	0.999939
Atxn2	70.4364	0.0740558	0.671036	0.999939
Atxn7l2	68.4051	0.0289435	0.868261	0.999939
Atxn7l3	56.9504	-0.0178222	0.916852	0.999939
Atxn7l3b	288.625	0.0576962	0.702199	0.999939
AU019823	75.9394	0.131225	0.451959	0.999939
AU021063	74.3315	0.0915151	0.599865	0.999939
AU040320	187.635	-0.0378567	0.819123	0.999939
Auh	289.194	-0.0799997	0.589261	0.999939
Aup1	613.302	0.0913318	0.501766	0.999939
Aurkaip1	285.838	-0.0533644	0.725082	0.999939
Avpi1	137.263	-0.0459672	0.783381	0.999939
AW209491	163.461	-0.0969874	0.550987	0.999939
Axin1	101.037	-0.048206	0.778909	0.999939
Azi2	98.5908	-0.0753638	0.660381	0.999939
Azin1	344.248	-0.258601	0.117565	0.999939
Azin2	63.261	-0.100265	0.564312	0.999939
B230209E15Rik	70.3793	0.30608	0.0793905	0.999939
B230217C12Rik	200.981	0.138468	0.382618	0.999939
B230219D22Rik	144.047	0.0225878	0.892684	0.999939
B2m	1613.36	0.0730123	0.506887	0.999939
B3galnt1	185.828	0.0383382	0.80986	0.999939
B3galt5	122.865	-0.164515	0.327133	0.999939
B3gat3	133.331	-0.204845	0.2396	0.999939
B3gnt2	217.497	-0.137774	0.370602	0.999939
B4galnt1	722.674	0.0215784	0.867707	0.999939
B4galt2	329.944	-0.149665	0.355873	0.999939
B4galt3	143.496	0.0743611	0.650824	0.999939
B4galt4	223.585	-0.0379003	0.813329	0.999939
B4galt7	58.9447	-0.0237409	0.890563	0.999939
B4gat1	499.478	0.159502	0.234668	0.999939
B630019K06Rik	68.9146	-0.136038	0.435623	0.999939
B930041F14Rik	104.801	0.105672	0.536772	0.999939
B9d2	98.6229	-0.190332	0.268844	0.999939
Babam1	246.027	-0.0288337	0.84912	0.999939
Bace1	144.609	0.0480786	0.773835	0.999939
Bad	198.248	-0.0612111	0.717614	0.999939
Bag1	988.2	-0.130895	0.318231	0.999939
Bag4	156.53	0.164381	0.313804	0.999939
Bag5	140.842	0.205393	0.212676	0.999939
Bag6	103.241	0.0554763	0.745814	0.999939
Bambi	56.2784	0.100052	0.556945	0.999939
Banf1	1234.91	0.130464	0.367332	0.999939
Banp	141.56	-0.000690174	0.996685	0.999939
Bap1	212.203	0.0395306	0.800283	0.999939
Basp1	1189.39	-0.0108194	0.936927	0.999939
Bax	438.863	-0.0451015	0.741202	0.999939
Bbc3	70.5772	0.173202	0.320951	0.999939
Bbip1	197.834	-0.077521	0.625569	0.999939
Bbs4	119.432	-0.233441	0.168547	0.999939
Bbs5	65.8997	0.0578174	0.740258	0.999939
BC002163	505.946	0.0120313	0.935859	0.999939
BC003331	180.039	0.0657014	0.684701	0.999939
BC003965	93.93	0.00532907	0.975257	0.999939
BC004004	121.267	-0.0820094	0.625513	0.999939
BC005624	247.644	0.0844439	0.57471	0.999939
BC017643	90.2935	-0.0825485	0.630416	0.999939
BC023829	90.4921	0.0156936	0.92832	0.999939
BC029214	111.854	0.121767	0.480353	0.999939
BC029722	143.719	-0.0448949	0.790705	0.999939
BC031181	658.771	-0.137454	0.308685	0.999939
Bcan	121.885	-0.383198	0.0271562	0.999939
Bcap29	303.763	0.156718	0.334087	0.999939
Bcap31	206.692	0.022764	0.883788	0.999939
Bcar1	382.52	0.0384041	0.793399	0.999939
Bcas1	71.2057	-0.177579	0.305293	0.999939
Bcas2	293.694	0.139243	0.344861	0.999939
Bcas3	261.183	-0.00154515	0.991947	0.999939
Bcat2	55.1494	-0.295266	0.0853576	0.999939
Bccip	319.482	0.157193	0.30825	0.999939
Bckdha	96.4994	-0.0573179	0.738756	0.999939
Bckdhb	195.297	-0.0828212	0.623392	0.999939
Bckdk	112.955	0.135913	0.421066	0.999939
Bcl11a	118.815	0.0844021	0.621138	0.999939
Bcl11b	481.864	0.259706	0.0864262	0.999939
Bcl2l1	625.586	0.111456	0.389952	0.999939
Bcl7b	192.14	0.0385008	0.810311	0.999939
Bclaf1	274.858	0.046041	0.763611	0.999939
Bcs1l	76.8898	0.263958	0.129734	0.999939
Bdh1	143.374	0.0432223	0.792706	0.999939
Bdnf	755.232	-0.00258648	0.983547	0.999939
Becn1	391.356	-0.0352092	0.804531	0.999939
Begain	88.0293	0.0106988	0.951029	0.999939
Bend6	196.448	-0.135472	0.394445	0.999939
Bet1	55.6438	0.123587	0.46625	0.999939
Bet1l	109.608	0.0266166	0.876685	0.999939
Bex1	324.771	0.0469251	0.757683	0.999939
Bex2	3134.27	0.0500337	0.711005	0.999939
Bex4	165.706	0.102957	0.533693	0.999939
Bfar	90.2175	-0.0613699	0.722197	0.999939
Bhlhb9	324.02	-0.00503354	0.972984	0.999939
Bhlhe40	158.561	0.157277	0.341219	0.999939
Bicd2	62.9352	0.0213821	0.900065	0.999939
Bin1	530.724	0.0842506	0.520948	0.999939
Birc2	80.9206	0.112771	0.517974	0.999939
Blcap	257.631	0.0122592	0.936831	0.999939
Blmh	193.814	-0.00769308	0.961092	0.999939
Bloc1s1	475.192	0.147802	0.358101	0.999939
Bloc1s2	172.783	-0.088208	0.584342	0.999939
Bloc1s4	171.77	0.177068	0.278992	0.999939
Bloc1s5	77.7311	0.134744	0.439408	0.999939
Bloc1s6	58.4193	0.0290763	0.866438	0.999939
Blvra	94.0145	-0.00164944	0.992374	0.999939
Blvrb	75.6387	-0.00679601	0.968926	0.999939
Blzf1	99.6731	-0.0741631	0.670565	0.999939
Bmi1	74.2004	0.180899	0.299835	0.999939
Bmp1	100.606	0.00776213	0.964286	0.999939
Bmyc	445.35	0.0309952	0.830807	0.999939
Bnip1	80.8377	0.10688	0.540229	0.999939
Bnip3	355.501	-0.132169	0.38314	0.999939
Bnip3l	167.479	0.0185021	0.909476	0.999939
Bod1	426.362	-0.02927	0.850756	0.999939
Bola1	111.923	0.085516	0.613384	0.999939
Bola2	293.201	-0.006493	0.968948	0.999939
Bola3	169.17	-0.214216	0.18791	0.999939
Bop1	198.463	-0.0242008	0.876773	0.999939
Bpgm	102.262	-0.232977	0.177481	0.999939
Bphl	164.83	-0.0782184	0.644819	0.999939
Bpnt1	149.579	-0.00814879	0.960216	0.999939
Brap	109.906	0.145055	0.391773	0.999939
Brat1	83.9657	0.13994	0.4225	0.999939
Brcc3	127.595	-0.136072	0.416076	0.999939
Brd2	241.341	0.0662621	0.685231	0.999939
Brd3	135.949	-0.0286624	0.865918	0.999939
Brd4	144.311	-0.00742003	0.965705	0.999939
Brd7	73.9259	-0.00469502	0.978533	0.999939
Brd8	129.918	0.0347852	0.834427	0.999939
Brd9	163.372	0.00623482	0.969714	0.999939
Bre	536.372	0.104663	0.532172	0.999939
Brf1	63.5161	0.223801	0.197777	0.999939
Brf2	59.7195	0.0458092	0.790683	0.999939
Bricd5	57.5077	-0.0647131	0.70564	0.999939
Brinp1	306.015	0.0607249	0.686116	0.999939
Brix1	94.2604	-0.0654115	0.705514	0.999939
Brk1	817.671	-0.0983904	0.4556	0.999939
Brms1	63.3797	-0.0745371	0.665153	0.999939
Brms1l	133.548	-0.0250005	0.882149	0.999939
Brox	62.5544	0.0794465	0.647026	0.999939
Brpf1	231.127	0.119958	0.436793	0.999939
Brsk2	280.442	0.0333994	0.834192	0.999939
Brwd1	69.4951	0.0925618	0.595823	0.999939
Bscl2	326.249	-0.272223	0.071422	0.999939
Bsdc1	71.7185	0.0795719	0.64841	0.999939
Bsg	2405.79	-0.0886875	0.483442	0.999939
Bst2	129.588	0.0520606	0.521179	0.999939
Btbd1	175.847	-0.0200987	0.899903	0.999939
Btbd10	120.923	0.0181742	0.913592	0.999939
Btbd2	98.0136	0.0688928	0.68999	0.999939
Btbd3	722.495	0.219931	0.128388	0.999939
Btbd6	165.051	-0.0160443	0.924601	0.999939
Btbd9	333.702	0.157164	0.28642	0.999939
Btf3	943.597	0.154275	0.237517	0.999939
Btg1	68.9324	0.202793	0.244119	0.999939
Btg2	137.706	-0.220798	0.196959	0.999939
Btg3	62.8232	-0.052387	0.75978	0.999939
Btrc	275.032	-0.00116686	0.993961	0.999939
Bub3	241.22	0.108019	0.513486	0.999939
Bud31	306.759	-0.104092	0.505206	0.999939
Bzw1	241.043	0.074371	0.640082	0.999939
Bzw2	151.358	-0.0823965	0.612129	0.999939
C1d	168.622	0.0465548	0.774327	0.999939
C1galt1c1	100.508	-0.0368704	0.830892	0.999939
C1qa	131.586	0.0421347	0.741998	0.999939
C1qb	218.112	0.0422609	0.808015	0.999939
C1qbp	334.411	0.0330184	0.817787	0.999939
C1qc	198.479	0.243638	0.161267	0.999939
C1ql3	172.008	0.0950771	0.573907	0.999939
C1qtnf4	1142.66	0.175113	0.156301	0.999939
C2cd2l	273.95	0.0337228	0.818807	0.999939
C2cd4b	103.889	0.260195	0.12775	0.999939
C2cd5	109.278	0.0104382	0.952281	0.999939
C87436	127.833	-0.0736256	0.673089	0.999939
Cab39	217.697	-0.0487014	0.752245	0.999939
Cables1	66.0167	-0.159938	0.359069	0.999939
Cabp1	83.9354	-0.268032	0.1223	0.999939
Cabp7	192.78	0.0976107	0.567537	0.999939
Cacfd1	97.2039	-0.0898711	0.6012	0.999939
Cacna1h	86.446	0.0116317	0.946621	0.999939
Cacna2d1	186.094	0.334983	0.0549073	0.999939
Cacna2d3	75.4014	-0.2796	0.107455	0.999939
Cacnb1	451.891	0.1256	0.388695	0.999939
Cacnb2	180.711	0.146567	0.370393	0.999939
Cacnb3	344.181	0.171636	0.274188	0.999939
Cacnb4	235.316	-0.116998	0.460715	0.999939
Cacng3	148.18	0.00944932	0.956307	0.999939
Cactin	72.8883	0.120908	0.488324	0.999939
Cacul1	62.9043	-0.244704	0.156578	0.999939
Cacybp	306.643	-0.156575	0.277154	0.999939
Cadm1	810.154	0.195347	0.161194	0.999939
Cadm2	228.14	0.141666	0.359959	0.999939
Cadps	113.161	-0.327482	0.0603619	0.999939
Cadps2	208.611	-0.362625	0.0353533	0.999939
Calb1	599.405	0.0527498	0.745653	0.999939
Calcoco1	83.3315	0.133332	0.44446	0.999939
Calm1	4082.4	0.120101	0.358298	0.999939
Calm2	13341.9	0.175354	0.17769	0.999939
Caln1	181.992	0.336168	0.0358949	0.999939
Calr	458.896	-0.0424287	0.751303	0.999939
Calu	272.457	-0.133051	0.386744	0.999939
Caly	4051.04	0.27738	0.024143	0.999939
Camk1d	171.349	0.163007	0.309607	0.999939
Camk2b	7946.17	0.185562	0.0830845	0.999939
Camk2d	84.4909	-0.368671	0.0276598	0.999939
Camk2g	97.4314	-0.00142611	0.99344	0.999939
Camk2n1	193.979	0.200059	0.238037	0.999939
Camkk1	653.239	0.194639	0.135012	0.999939
Camkk2	159.906	0.144822	0.380063	0.999939
Camkv	1121.44	0.190894	0.13059	0.999939
Caml	153.133	0.20635	0.21166	0.999939
Camsap1	131.415	0.0782224	0.637414	0.999939
Camta1	131.487	0.159381	0.342179	0.999939
Camta2	1421.28	0.0450185	0.724552	0.999939
Cant1	239.989	0.29279	0.0612121	0.999939
Canx	670.555	-0.176194	0.241081	0.999939
Cap1	109.86	-0.000721759	0.996676	0.999939
Cap2	303.601	0.220886	0.13017	0.999939
Capn3	98.9992	-0.110088	0.526365	0.999939
Capn5	74.4371	-0.215253	0.21575	0.999939
Capn7	69.5196	0.0851275	0.625	0.999939
Capns1	61.2919	-0.209574	0.226586	0.999939
Caprin1	417.396	0.102509	0.497584	0.999939
Capza2	1375.11	0.140355	0.274881	0.999939
Capzb	3649.65	-0.0619957	0.658997	0.999939
Car11	286.252	0.0507994	0.735418	0.999939
Car12	100.412	0.0982599	0.567501	0.999939
Car2	155.901	0.0991809	0.542781	0.999939
Car4	94.1237	0.0994554	0.564771	0.999939
Car7	60.3919	0.273977	0.114279	0.999939
Carkd	670.8	-0.0433673	0.763164	0.999939
Carm1	227.276	-0.011214	0.943397	0.999939
Cars	116.803	-0.196017	0.259767	0.999939
Casc3	61.9317	0.0284468	0.869785	0.999939
Casc4	232.276	0.107809	0.502537	0.999939
Casd1	117.503	0.0205102	0.902967	0.999939
Cask	74.6081	0.0312546	0.856634	0.999939
Cat	137.741	-0.0288918	0.864208	0.999939
Cbfa2t2	99.6897	0.0208487	0.903185	0.999939
Cbfb	323.611	0.412343	0.0167251	0.999939
Cbll1	115.688	0.176455	0.309919	0.999939
Cbr1	252.05	-0.0491354	0.743715	0.999939
Cbwd1	67.4851	0.0426361	0.806207	0.999939
Cbx4	57.6051	-0.0823294	0.633763	0.999939
Cbx5	175.701	0.153134	0.348984	0.999939
Cbx6	221.302	0.248363	0.139599	0.999939
Cbx7	85.628	-0.038453	0.824297	0.999939
Cby1	189.804	0.0749717	0.635901	0.999939
Ccar1	60.3774	-0.0514893	0.766931	0.999939
Ccar2	169.951	-0.0287433	0.858614	0.999939
Ccdc101	70.938	0.117708	0.49842	0.999939
Ccdc106	300.905	0.0213015	0.886453	0.999939
Ccdc107	183.448	-0.133962	0.425638	0.999939
Ccdc115	133.524	0.0761178	0.646269	0.999939
Ccdc12	353.016	0.00464809	0.974753	0.999939
Ccdc124	448.392	-0.161176	0.251463	0.999939
Ccdc127	81.7853	-0.0495208	0.77535	0.999939
Ccdc130	94.2877	-0.244964	0.1567	0.999939
Ccdc132	171.663	0.0907745	0.58595	0.999939
Ccdc149	77.4518	-0.12402	0.477205	0.999939
Ccdc166	59.5053	0.256942	0.13854	0.999939
Ccdc174	62.1843	-0.0700818	0.686237	0.999939
Ccdc181	55.4723	-0.0614841	0.719975	0.999939
Ccdc23	183.42	-0.0785976	0.633513	0.999939
Ccdc25	95.5352	-0.0654277	0.702746	0.999939
Ccdc28a	61.2367	-0.185475	0.284824	0.999939
Ccdc28b	186.26	0.108329	0.49945	0.999939
Ccdc30	57.2632	0.145422	0.398909	0.999939
Ccdc32	181.875	-0.0826043	0.61342	0.999939
Ccdc43	124.381	-0.136462	0.416909	0.999939
Ccdc47	219.716	0.0758382	0.627306	0.999939
Ccdc53	154.172	-0.0461118	0.790568	0.999939
Ccdc58	128.205	0.346469	0.0471033	0.999939
Ccdc59	161.565	0.173088	0.287329	0.999939
Ccdc71l	122.487	0.225854	0.179516	0.999939
Ccdc74a	73.9533	-0.143827	0.409515	0.999939
Ccdc85a	310.703	0.245798	0.104956	0.999939
Ccdc85b	211.643	0.0790946	0.625205	0.999939
Ccdc90b	75.9118	-0.17236	0.319497	0.999939
Ccdc91	81.9716	-0.126464	0.466083	0.999939
Ccdc92	207.675	-0.0984121	0.536562	0.999939
Ccdc97	81.4542	-0.0673085	0.698993	0.999939
Cck	1719.85	-0.0102046	0.951126	0.999939
Ccl27a	189.522	-0.0504125	0.762087	0.999939
Ccl5	156.387	0.0509431	0.360321	0.999939
Ccm2	294.254	0.113959	0.446587	0.999939
Ccnc	120.828	-0.0898814	0.596104	0.999939
Ccnd3	127.053	-0.0153265	0.928868	0.999939
Ccndbp1	139.671	-0.0735198	0.654983	0.999939
Ccng1	77.1789	-0.20631	0.235052	0.999939
Ccng2	132.204	0.0350388	0.832979	0.999939
Ccnh	242.842	0.0387892	0.802377	0.999939
Ccni	269.327	-0.0139849	0.926151	0.999939
Ccnl1	91.6434	0.135178	0.432685	0.999939
Ccnl2	123.081	0.103036	0.538248	0.999939
Ccpg1	473.455	0.203873	0.129585	0.999939
Ccrn4l	159.818	0.0500811	0.757677	0.999939
Ccs	81.8968	-0.064309	0.710851	0.999939
Ccsap	228.69	-0.00286577	0.985453	0.999939
Cct2	228.577	-0.126404	0.450048	0.999939
Cct3	375.947	-0.0654532	0.64933	0.999939
Cct4	265.767	-0.0874924	0.558789	0.999939
Cct5	862.126	0.162527	0.195446	0.999939
Cct6a	523.906	-0.0523134	0.696086	0.999939
Cct7	491.438	0.00427488	0.974725	0.999939
Cct8	404.283	-0.108548	0.457886	0.999939
Ccz1	94.3127	-0.0290944	0.865696	0.999939
Cd164	85.1358	-0.110881	0.523224	0.999939
Cd200	145.212	-0.220586	0.189746	0.999939
Cd2bp2	367.824	-0.0721226	0.63262	0.999939
Cd302	124.416	-0.0877443	0.602583	0.999939
Cd320	55.4218	-0.280106	0.102447	0.999939
Cd47	617.24	-0.0241515	0.856504	0.999939
Cd63	586.697	-0.180938	0.272173	0.999939
Cd81	959.812	-0.257659	0.0569658	0.999939
Cd82	111.206	0.143459	0.410823	0.999939
Cd83	120.29	0.0815937	0.639779	0.999939
Cd9	240.902	-0.130741	0.450314	0.999939
Cd99l2	105.451	-0.12455	0.468705	0.999939
Cdadc1	332.325	0.00905833	0.950956	0.999939
Cdc123	237.476	-0.00397586	0.979726	0.999939
Cdc16	152.89	-0.138268	0.396711	0.999939
Cdc23	79.6125	-0.050173	0.773284	0.999939
Cdc26	100.823	-0.0296295	0.863933	0.999939
Cdc27	98.7852	0.231471	0.17657	0.999939
Cdc34	162.196	-0.234048	0.147411	0.999939
Cdc37	325.417	0.0651177	0.666957	0.999939
Cdc40	140.111	0.257957	0.12083	0.999939
Cdc42	1017.41	-0.103278	0.409327	0.999939
Cdc42ep4	268.655	0.0957535	0.562467	0.999939
Cdc42se1	120.084	0.0466793	0.78036	0.999939
Cdc42se2	607.662	0.0692928	0.619543	0.999939
Cdc5l	87.1362	-0.120817	0.484613	0.999939
Cdh8	223.348	0.133853	0.392468	0.999939
Cdh9	77.5262	-0.0114257	0.947783	0.999939
Cdip1	569.364	0.135626	0.2968	0.999939
Cdipt	374.775	-0.205329	0.167366	0.999939
Cdk10	140.754	-0.261186	0.119404	0.999939
Cdk11b	80.2459	0.119412	0.493111	0.999939
Cdk14	148.121	0.112813	0.501844	0.999939
Cdk16	260.449	-0.0876841	0.583033	0.999939
Cdk17	401.101	0.0667252	0.633167	0.999939
Cdk19	101.297	-0.231918	0.181377	0.999939
Cdk2ap2	93.1156	-0.113895	0.512083	0.999939
Cdk4	268.417	-0.146231	0.326693	0.999939
Cdk5	242.901	-0.190087	0.222652	0.999939
Cdk5r2	55.5856	0.0316758	0.847518	0.999939
Cdk5rap3	180.068	-0.0849502	0.606884	0.999939
Cdk9	106.609	-0.0247509	0.883939	0.999939
Cdkl2	64.1397	-0.115072	0.508447	0.999939
Cdkn2aipnl	220.353	0.130695	0.416641	0.999939
Cdkn2d	284.717	-0.0767413	0.599913	0.999939
Cdo1	81.6919	0.0854181	0.624198	0.999939
Cdpf1	197.507	-0.193232	0.268172	0.999939
Cdr1	168.026	0.233185	0.160657	0.999939
Cds2	96.0836	0.0591775	0.734071	0.999939
Cdv3	59.9671	0.02117	0.900971	0.999939
Cebpb	1923.42	0.258369	0.134293	0.999939
Cebpzos	208.713	-0.201407	0.206595	0.999939
Celf1	392.131	0.25872	0.0811268	0.999939
Celf2	396.472	-0.0870186	0.549211	0.999939
Celf3	387.953	0.153616	0.332121	0.999939
Celf4	1746.32	0.0747717	0.563177	0.999939
Celsr2	65.8428	-0.0188573	0.912202	0.999939
Cenpa	126.578	0.213322	0.220375	0.999939
Cenpv	149.503	0.0138225	0.933772	0.999939
Cep170b	70.6898	-0.218233	0.21077	0.999939
Cep19	238.7	-0.0176064	0.909153	0.999939
Cep57	76.1591	0.0383143	0.826209	0.999939
Cep57l1	54.6002	-0.167535	0.302579	0.999939
Cep63	71.524	-0.0326261	0.851505	0.999939
Cept1	134.973	-0.101905	0.55076	0.999939
Cers1	282.045	0.0773823	0.61504	0.999939
Cers2	70.4018	-0.0767508	0.65985	0.999939
Cers5	61.6655	-0.0553355	0.74994	0.999939
Cetn2	246.992	0.121957	0.437095	0.999939
Cetn3	504.133	0.0991982	0.502876	0.999939
Cfap20	223.823	-0.0851426	0.597759	0.999939
Cfap36	373.619	0.00813229	0.955012	0.999939
Cfdp1	356.148	-0.0718943	0.611882	0.999939
Cfl1	3127.42	0.0363496	0.72803	0.999939
Cfl2	104.64	0.0555428	0.744803	0.999939
Cggbp1	94.5527	-0.165246	0.336869	0.999939
Cgref1	70.4447	-0.253392	0.14486	0.999939
Cgrrf1	54.2989	-0.143289	0.403843	0.999939
Chac2	140.958	0.171551	0.30803	0.999939
Chchd1	398.672	-0.10626	0.50757	0.999939
Chchd10	766.47	-0.294918	0.0333471	0.999939
Chchd2	865.221	-0.0323574	0.825592	0.999939
Chchd3	146.465	-0.223751	0.191497	0.999939
Chchd4	232.613	-0.129912	0.406623	0.999939
Chchd6	555.529	-0.0416127	0.751472	0.999939
Chchd7	262.181	0.0112575	0.945241	0.999939
Chd3	64.3389	0.100537	0.561578	0.999939
Chd3os	305.03	-0.242373	0.0938792	0.999939
Cherp	79.9807	0.164004	0.346683	0.999939
Chfr	159.328	0.0891182	0.600051	0.999939
Chga	292.797	-0.194269	0.208224	0.999939
Chgb	667.058	-0.046032	0.723968	0.999939
Chid1	123.436	-0.245293	0.145115	0.999939
Chka	185.37	0.088957	0.60005	0.999939
Chkb	110.396	-0.205803	0.232192	0.999939
Chmp1a	284.393	-0.0283863	0.85421	0.999939
Chmp2a	636.227	0.0503471	0.708709	0.999939
Chmp2b	176.429	-0.107994	0.49796	0.999939
Chmp3	221.32	0.0163226	0.915079	0.999939
Chmp5	330.97	0.177995	0.20929	0.999939
Chmp6	143.907	-0.0685785	0.675367	0.999939
Chmp7	222.626	-0.057282	0.713683	0.999939
Chn1	9337.24	0.154848	0.192511	0.999939
Chn1os3	430.938	0.122218	0.403384	0.999939
Chordc1	117.918	-0.00242887	0.988485	0.999939
Chp1	177.665	-0.0487869	0.759963	0.999939
Chpf	466.99	0.203842	0.190216	0.999939
Chpt1	74.8286	-0.096455	0.577746	0.999939
Chrac1	123.222	0.0551897	0.751247	0.999939
Chrd	66.8208	0.152477	0.377933	0.999939
Chrm1	578.18	0.201165	0.123625	0.999939
Chst1	771.158	0.0402846	0.77805	0.999939
Chst10	80.205	-0.413805	0.0175289	0.999939
Chst12	109.37	0.226576	0.182937	0.999939
Chst15	87.9485	0.18881	0.275578	0.999939
Chst2	80.2502	0.00632607	0.971083	0.999939
Chtop	1121.41	0.0594689	0.621964	0.999939
Chuk	59.6754	-0.235175	0.166982	0.999939
Churc1	291.168	-0.0507548	0.746075	0.999939
Ciao1	87.1808	0.0476173	0.782962	0.999939
Ciart	62.7167	0.187938	0.279968	0.999939
Cidea	111.755	-0.077888	0.648193	0.999939
Cinp	194.028	0.186435	0.241306	0.999939
Cipc	406.082	0.057746	0.713818	0.999939
Cirbp	566.734	0.102952	0.444443	0.999939
Cirh1a	167.738	0.0428638	0.790043	0.999939
Cisd1	958.87	-0.00761529	0.951028	0.999939
Cisd2	81.6057	0.158883	0.362551	0.999939
Cisd3	99.6475	-0.0656002	0.702041	0.999939
Cited2	77.6778	-0.11807	0.498578	0.999939
Ciz1	249.918	0.0493291	0.73591	0.999939
Ckap5	107.248	-0.0309709	0.856778	0.999939
Ckb	3428.05	-0.229232	0.0786057	0.999939
Ckmt1	337.86	-0.22482	0.147027	0.999939
Clasp2	145.064	-0.0212996	0.902624	0.999939
Clasrp	324.801	-0.218533	0.198596	0.999939
Clcc1	146.087	0.294442	0.0728612	0.999939
Clcn3	437.373	0.0195034	0.889119	0.999939
Clcn4-2	553.546	0.00504164	0.969154	0.999939
Cldn10	259.689	-0.306517	0.0522126	0.999939
Cldn12	173.977	0.0131378	0.93888	0.999939
Cldnd1	616.934	-0.108496	0.448477	0.999939
Clec2l	175.172	0.06205	0.700172	0.999939
Clint1	68.4029	-0.0553531	0.751075	0.999939
Clip1	174.41	-0.213556	0.198894	0.999939
Clip3	366.233	-0.0612783	0.710872	0.999939
Clip4	190.571	0.208631	0.209791	0.999939
Clk1	188.296	-0.00196313	0.98918	0.999939
Clk2	89.1576	-0.0933381	0.590541	0.999939
Clk2-scamp3	244.889	0.0554305	0.717791	0.999939
Clk3	83.6957	0.0432718	0.803772	0.999939
Clk4	161.191	0.130452	0.420656	0.999939
Clmp	71.6148	0.104368	0.549452	0.999939
Clns1a	168.913	0.0802196	0.617692	0.999939
Clpp	309.183	-0.110092	0.465338	0.999939
Clptm1	180.648	-0.0892308	0.581328	0.999939
Clptm1l	295.277	0.00819838	0.957637	0.999939
Clpx	156.553	0.0288391	0.860592	0.999939
Clstn1	938.146	-0.264373	0.100083	0.999939
Clstn2	80.5878	-0.144715	0.406436	0.999939
Clstn3	223.801	-0.395099	0.0194243	0.999939
Clta	2685.54	0.0661472	0.567877	0.999939
Cltb	544.38	-0.0511211	0.699525	0.999939
Cltc	182.743	-0.0637293	0.689508	0.999939
Cluap1	78.3466	-0.0928316	0.59436	0.999939
Clvs1	62.9426	-0.146784	0.393816	0.999939
Clvs2	124.505	0.182676	0.272722	0.999939
Clybl	58.5925	-0.105503	0.537861	0.999939
Cmas	272.784	-0.219799	0.14219	0.999939
Cmc4	71.2118	0.302878	0.0826228	0.999939
Cmip	316.995	-0.0396196	0.788073	0.999939
Cmpk1	185.833	-0.198668	0.210924	0.999939
Cmtm5	135.379	-0.155022	0.240967	0.999939
Cmtr1	81.9248	0.0275376	0.873877	0.999939
Cnbp	4219.39	0.113229	0.35402	0.999939
Cndp2	253.02	-0.101703	0.536706	0.999939
Cnep1r1	64.5526	0.0859037	0.622024	0.999939
Cnih1	327.94	0.18013	0.226202	0.999939
Cnih2	4439.01	0.00135072	0.991446	0.999939
Cnih3	1125.59	-0.143375	0.359886	0.999939
Cnksr2	135.222	0.241229	0.146489	0.999939
Cnn3	162.665	-0.206073	0.213632	0.999939
Cnnm1	89.5357	0.0516899	0.766862	0.999939
Cnnm2	101.369	0.123947	0.470214	0.999939
Cnot1	73.9787	0.130847	0.453107	0.999939
Cnot10	69.9486	-0.136608	0.433442	0.999939
Cnot2	411.659	0.0587789	0.677477	0.999939
Cnot3	58.4855	-0.0224506	0.896873	0.999939
Cnot4	107.838	0.159096	0.348633	0.999939
Cnot6	95.5458	0.045372	0.792748	0.999939
Cnot7	613.107	-0.0101109	0.9434	0.999939
Cnot8	255.11	0.140491	0.345655	0.999939
Cnp	261.641	-0.10425	0.484944	0.999939
Cnppd1	66.4296	0.0375824	0.828039	0.999939
Cnpy2	328.895	0.0332654	0.820929	0.999939
Cnpy3	640.16	-0.147794	0.338651	0.999939
Cnrip1	400.331	-0.0951371	0.525562	0.999939
Cntd1	73.8892	-0.025819	0.882369	0.999939
Cntn1	590.936	0.20507	0.117651	0.999939
Coa3	836.905	-0.0966797	0.479496	0.999939
Coa5	69.4099	0.0951841	0.585395	0.999939
Coa6	195.144	0.0437005	0.796609	0.999939
Cog1	77.1155	0.0170349	0.922051	0.999939
Cog4	93.9661	-0.219205	0.205254	0.999939
Cog6	78.9846	0.14152	0.416597	0.999939
Cog7	119.653	-0.0187968	0.910667	0.999939
Cog8	95.4768	-0.254231	0.138174	0.999939
Colgalt1	78.3868	-0.0961723	0.581566	0.999939
Commd1	327.535	0.0244667	0.875686	0.999939
Commd10	152.248	0.104781	0.518409	0.999939
Commd3	539.619	0.0254361	0.867332	0.999939
Commd4	338.006	-0.0855487	0.550463	0.999939
Commd5	115.601	-0.213361	0.208606	0.999939
Commd6	434.697	0.0318442	0.845062	0.999939
Commd7	90.8951	0.015235	0.930431	0.999939
Commd8	120.158	0.0983722	0.563801	0.999939
Commd9	117.124	-0.142263	0.410377	0.999939
Comt	752.576	0.201484	0.126461	0.999939
Copa	144.028	-0.0413119	0.807648	0.999939
Copb1	108.616	0.030357	0.858954	0.999939
Copb2	139.705	-0.0712203	0.668017	0.999939
Cope	591.452	-0.023155	0.860273	0.999939
Copg1	308.642	-0.162923	0.268157	0.999939
Cops2	303.425	-0.141369	0.342851	0.999939
Cops3	302.32	0.0432566	0.768583	0.999939
Cops4	257.049	-0.0778745	0.602498	0.999939
Cops5	545.13	0.0652861	0.649469	0.999939
Cops6	736.377	0.0841194	0.534333	0.999939
Cops8	355.556	0.000192659	0.998926	0.999939
Copz1	321.94	0.0245348	0.865617	0.999939
Coq10a	70.8404	-0.138942	0.425926	0.999939
Coq10b	118.866	0.188802	0.264809	0.999939
Coq2	272.726	0.101319	0.507591	0.999939
Coq5	124.412	-0.0892978	0.594004	0.999939
Coq6	59.5045	-0.17218	0.320494	0.999939
Coq7	245.343	-0.00900447	0.954289	0.999939
Coq9	219.108	-0.179958	0.242728	0.999939
Coro1a	636.013	0.169375	0.203158	0.999939
Coro1b	210.246	-0.0237756	0.878575	0.999939
Coro1c	213.138	0.0424771	0.791439	0.999939
Coro2b	64.5235	0.0326336	0.85086	0.999939
Coro7	78.1447	-0.00305828	0.985992	0.999939
Cox14	783.926	-0.0246143	0.869036	0.999939
Cox16	190.864	0.0650229	0.680084	0.999939
Cox17	680.187	-0.0353192	0.829795	0.999939
Cox18	181.756	0.175796	0.289688	0.999939
Cox19	176.83	-0.0556167	0.727333	0.999939
Cox20	285.39	0.0845246	0.616164	0.999939
Cox4i1	5421.9	-0.0865621	0.470653	0.999939
Cox5a	1910.47	-0.0947727	0.471468	0.999939
Cox5b	1510.81	-0.0649613	0.641068	0.999939
Cox6a1	2619.32	-0.0518523	0.688788	0.999939
Cox6b1	1886.6	-0.184532	0.135592	0.999939
Cox6c	3798.01	-0.0328004	0.848685	0.999939
Cox7a2	1325.95	-0.0786057	0.59487	0.999939
Cox7a2l	732.728	-0.0856514	0.568958	0.999939
Cox7b	898.087	-0.0928341	0.544332	0.999939
Cox7c	716.573	-0.0467913	0.766047	0.999939
Cox8a	2700.46	-0.126731	0.321799	0.999939
Cpe	1665.46	-0.115227	0.461268	0.999939
Cpeb1	275.85	-0.0103857	0.944941	0.999939
Cpeb4	104.905	0.205993	0.231661	0.999939
Cplx1	731.422	-0.319246	0.0531982	0.999939
Cplx2	112.875	0.218047	0.210857	0.999939
Cpne1	74.9353	0.00501009	0.97703	0.999939
Cpne4	64.4858	-0.024487	0.888246	0.999939
Cpne6	3570.76	-0.113056	0.377927	0.999939
Cpox	87.2059	0.0290442	0.866435	0.999939
Cpped1	69.5898	0.20208	0.246627	0.999939
Cpsf1	99.1745	-0.19145	0.270405	0.999939
Cpsf3	101.075	-0.097332	0.572067	0.999939
Cpsf3l	91.3331	-0.266126	0.122354	0.999939
Cpsf4	93.095	0.18998	0.276281	0.999939
Cpt1c	382.31	0.0969316	0.498541	0.999939
Crbn	273.25	0.147395	0.323324	0.999939
Crcp	117.278	0.171811	0.306136	0.999939
Creb3	199.353	-0.21075	0.183506	0.999939
Crebzf	188.915	-0.250812	0.11992	0.999939
Creg1	96.5661	-0.017665	0.918376	0.999939
Creg2	71.6541	0.00240039	0.988959	0.999939
Creld1	132.888	-0.0598408	0.724446	0.999939
Creld2	77.6094	-0.00591636	0.972932	0.999939
Crem	212.809	-0.0737538	0.64989	0.999939
Crip2	289.159	-0.19578	0.241193	0.999939
Cript	330.527	0.0364292	0.810125	0.999939
Crk	324.128	0.0175749	0.907251	0.999939
Crkl	60.0701	-0.00792488	0.96357	0.999939
Crlf1	387.888	0.211203	0.161205	0.999939
Crlf3	73.4067	-0.0158573	0.927584	0.999939
Crls1	347.05	0.0584775	0.711659	0.999939
Crmp1	848.146	-0.0652848	0.661733	0.999939
Crtac1	149.522	0.00974641	0.955461	0.999939
Crtc1	129.438	0.282272	0.0966805	0.999939
Cry2	207.126	-0.0605324	0.69621	0.999939
Cryab	442.233	-0.0409568	0.768412	0.999939
Cryl1	55.8722	0.114104	0.505567	0.999939
Crym	152.22	0.0453759	0.731609	0.999939
Cryzl1	484.111	0.0430753	0.779898	0.999939
Cs	339.453	-0.125157	0.386067	0.999939
Csdc2	372.376	-0.14368	0.339467	0.999939
Csde1	423.205	0.107646	0.456801	0.999939
Cse1l	64.049	0.0849861	0.623797	0.999939
Csf1	62.6955	0.180985	0.297243	0.999939
Csnk1a1	431.014	0.0872306	0.553481	0.999939
Csnk1d	341.711	-0.112683	0.45904	0.999939
Csnk1e	143.715	0.0461141	0.788831	0.999939
Csnk1g2	437.923	-0.201809	0.1814	0.999939
Csnk1g3	66.6725	0.0424654	0.807677	0.999939
Csnk2b	954.015	0.094339	0.464078	0.999939
Cspg5	278.685	-0.292199	0.0759384	0.999939
Csrnp3	56.873	0.111215	0.516507	0.999939
Cst3	4595.71	-0.344752	0.019576	0.999939
Cstb	305.674	-0.030594	0.841677	0.999939
Cstf1	70.1194	0.156277	0.370444	0.999939
Cstf2	96.9798	-0.048781	0.775843	0.999939
Cstf2t	182.017	0.110683	0.503651	0.999939
Cstf3	84.6405	0.0976444	0.572703	0.999939
Ctage5	172.25	0.197998	0.23579	0.999939
Ctbp1	1561.18	0.13425	0.246726	0.999939
Ctc1	129.218	-0.0220209	0.899522	0.999939
Ctcf	78.1208	0.236012	0.175521	0.999939
Ctdnep1	70.731	0.186927	0.281999	0.999939
Ctdspl2	89.9756	0.0785083	0.652475	0.999939
Ctnna2	157.84	0.111312	0.49954	0.999939
Ctnnb1	862.895	-0.0411177	0.753898	0.999939
Ctnnbip1	80.273	0.0176795	0.918598	0.999939
Ctnnbl1	70.1451	0.0155466	0.928996	0.999939
Ctps	88.5775	-0.0477364	0.78243	0.999939
Ctps2	104.84	0.216816	0.203789	0.999939
Ctsa	243.381	-0.198541	0.205583	0.999939
Ctsb	521.606	-0.113083	0.402826	0.999939
Ctsd	739.941	-0.127018	0.428602	0.999939
Ctsf	119.496	-0.146666	0.394486	0.999939
Ctsl	206.713	-0.0962688	0.536891	0.999939
Ctss	665.744	-0.0137929	0.918579	0.999939
Ctsz	164.455	-0.0195887	0.907534	0.999939
Cttn	584.119	0.0109266	0.933642	0.999939
Cttnbp2	105.456	0.13439	0.434125	0.999939
Ctxn1	1189.25	0.261571	0.0381071	0.999939
Ctxn2	94.0734	0.317909	0.0661772	0.999939
Cuedc2	2258.75	-0.0533169	0.66673	0.999939
Cul1	206.026	-0.0387975	0.805754	0.999939
Cul2	82.3579	0.154447	0.37396	0.999939
Cul3	142.322	0.00185478	0.991	0.999939
Cul4a	102.486	-0.0575137	0.738229	0.999939
Cul5	104.553	-0.0251532	0.883799	0.999939
Cutc	79.1115	0.197509	0.257722	0.999939
Cwc15	268.512	-0.0511251	0.734732	0.999939
Cwc27	55.9145	0.0354024	0.835086	0.999939
Cx3cl1	907.62	0.000366721	0.997868	0.999939
Cxcl12	100.641	0.254453	0.143	0.999939
Cxcl14	104.472	-0.0823133	0.337535	0.999939
Cxx1a	57.9907	-0.158532	0.35594	0.999939
Cxx1b	88.4384	-0.0634781	0.715015	0.999939
Cxx1c	299.002	0.0392846	0.794374	0.999939
Cxxc1	98.7594	0.273647	0.109215	0.999939
Cxxc5	174.829	0.18997	0.236915	0.999939
Cyb561	65.3597	-0.1425	0.410631	0.999939
Cyb561a3	102.785	0.0242558	0.887994	0.999939
Cyb561d1	55.6447	-0.0540259	0.753631	0.999939
Cyb5a	262.153	-0.156809	0.296993	0.999939
Cyb5b	117.952	-0.190595	0.258463	0.999939
Cyb5r1	54.5475	-0.119972	0.482636	0.999939
Cyb5r3	184.892	0.0275797	0.866717	0.999939
Cyb5r4	74.2227	0.043317	0.80377	0.999939
Cyba	83.9117	0.0890499	0.604131	0.999939
Cyc1	906.111	-0.247178	0.0856226	0.999939
Cycs	94.4003	-0.0135291	0.93786	0.999939
Cyfip1	267.833	0.0410481	0.785889	0.999939
Cyfip2	975.504	0.0389144	0.754273	0.999939
Cygb	194.224	-0.0241928	0.879192	0.999939
Cyhr1	218.037	-0.0251738	0.878256	0.999939
Cyld	89.5457	0.0790648	0.647682	0.999939
Cyp46a1	462.477	0.0640849	0.660431	0.999939
Cyp7b1	114.27	0.170869	0.31545	0.999939
Cys1	160.057	0.078665	0.642123	0.999939
Cystm1	250.74	0.0258846	0.862834	0.999939
Cyth1	510.07	0.253586	0.0768098	0.999939
Cyth2	323.319	0.154879	0.280669	0.999939
Cyth3	138.037	0.0111892	0.947278	0.999939
D030056L22Rik	100.482	-0.0456483	0.791086	0.999939
D10Jhu81e	125.356	0.219688	0.196012	0.999939
D17Wsu92e	219.5	0.130953	0.399363	0.999939
D19Bwg1357e	129.873	-0.383194	0.0211009	0.999939
D1Ertd622e	58.587	0.114684	0.50154	0.999939
D230025D16Rik	77.7915	0.050358	0.772872	0.999939
D2Wsu81e	132.84	-0.207091	0.216876	0.999939
D6Wsu163e	62.257	0.150397	0.386688	0.999939
D8Ertd738e	370.345	-0.156589	0.281732	0.999939
Dab1	285.868	0.144323	0.329663	0.999939
Dact3	74.3237	-0.184368	0.290207	0.999939
Dad1	247.003	0.0449774	0.766604	0.999939
Dag1	354.455	-0.129161	0.433924	0.999939
Dagla	62.4405	0.138872	0.408786	0.999939
Daglb	133.733	0.245876	0.14346	0.999939
Dalrd3	181.617	-0.0512955	0.75623	0.999939
Dand5	74.4018	-0.0946874	0.587363	0.999939
Dap3	172.539	-0.0461246	0.773297	0.999939
Dapk1	214.539	0.00390448	0.979918	0.999939
Dapk3	511.309	-0.00887974	0.950183	0.999939
Dars	197.642	-0.116855	0.464294	0.999939
Daxx	104.797	-0.231043	0.182338	0.999939
Dazap1	128.567	-0.0577462	0.728635	0.999939
Dazap2	380.825	0.049855	0.729073	0.999939
Dbi	1493.39	-0.268852	0.0824617	0.999939
Dbn1	2007.07	0.17474	0.138719	0.999939
Dbndd2	478.507	0.168026	0.272062	0.999939
Dbnl	483.249	0.208619	0.119829	0.999939
Dbp	219.667	0.208877	0.203786	0.999939
Dcaf11	372.479	0.148303	0.317021	0.999939
Dcaf12	67.2372	-0.115923	0.504462	0.999939
Dcaf12l1	135.31	0.0855041	0.613679	0.999939
Dcaf13	131.974	0.0310797	0.851357	0.999939
Dcaf4	119.909	-0.120552	0.487284	0.999939
Dcaf7	169.357	0.0905374	0.573113	0.999939
Dcaf8	208.258	-0.0100774	0.948448	0.999939
Dcakd	247.749	0.222293	0.172357	0.999939
Dclk1	526.637	-0.0630459	0.639469	0.999939
Dclk2	349.992	-0.155018	0.283486	0.999939
Dclk3	91.4925	-0.0567636	0.741727	0.999939
Dcps	103.478	0.00869996	0.959213	0.999939
Dctn1	924.629	0.154291	0.214748	0.999939
Dctn2	1725.1	-0.0243012	0.839936	0.999939
Dctn3	1194.47	-0.175537	0.172169	0.999939
Dctn5	275.858	0.00656926	0.964547	0.999939
Dctn6	957.703	-0.0168071	0.901826	0.999939
Dctpp1	123.495	0.00455298	0.978219	0.999939
Dcun1d1	143.471	-0.074241	0.653649	0.999939
Dcun1d2	277.876	-0.122826	0.43915	0.999939
Dcun1d4	385.648	-0.174581	0.226768	0.999939
Dcun1d5	238.382	0.0287838	0.862789	0.999939
Dda1	1092.1	-0.0947386	0.425857	0.999939
Ddb1	116.801	-0.133724	0.436111	0.999939
Ddhd1	95.6185	0.0507034	0.767539	0.999939
Ddit3	271.252	0.0103681	0.949717	0.999939
Ddost	295.17	0.0810524	0.589289	0.999939
Ddr1	206.699	0.119498	0.471112	0.999939
Ddrgk1	222.258	0.114173	0.457273	0.999939
Ddt	202.53	0.00174667	0.991048	0.999939
Ddx1	332.787	0.0150785	0.917467	0.999939
Ddx24	779.104	0.0993646	0.439972	0.999939
Ddx25	112.405	0.0257483	0.879126	0.999939
Ddx27	70.6535	-0.0302797	0.862234	0.999939
Ddx39	61.4319	-0.030116	0.862355	0.999939
Ddx39b	397.119	0.307495	0.029902	0.999939
Ddx3x	124.934	0.0103752	0.952504	0.999939
Ddx41	86.3938	-0.175526	0.314461	0.999939
Ddx42	102.433	0.10745	0.534691	0.999939
Ddx47	120.475	0.0958196	0.571675	0.999939
Ddx49	90.2676	-0.0967404	0.577058	0.999939
Ddx5	448.818	0.174536	0.238019	0.999939
Ddx50	116.275	0.106647	0.530005	0.999939
Ddx55	54.3405	-0.0721217	0.674263	0.999939
Ddx56	83.8433	-0.142822	0.411897	0.999939
Ddx6	81.654	0.389666	0.0255206	0.999939
Deaf1	500.942	0.190991	0.147879	0.999939
Dear1	57.8533	0.0276903	0.871755	0.999939
Deb1	416.129	0.0224449	0.883228	0.999939
Decr2	74.5242	-0.227342	0.192203	0.999939
Dedd	119.4	-0.167712	0.329875	0.999939
Def8	133.118	-0.0699313	0.686033	0.999939
Degs1	155.291	-0.0846528	0.61146	0.999939
Dek	114.566	0.114249	0.503468	0.999939
Denr	195.147	0.0270609	0.864147	0.999939
Derl1	144.319	-0.0430121	0.793151	0.999939
Derl2	146.515	0.0916941	0.59025	0.999939
Desi1	108.389	-0.0386022	0.820561	0.999939
Dexi	227.079	-0.0571666	0.7325	0.999939
Dffa	77.2878	-0.19228	0.269658	0.999939
Dgat2	1023.02	-0.0642088	0.662501	0.999939
Dgcr14	140.566	0.0485475	0.773207	0.999939
Dgcr2	257.765	0.0620106	0.676614	0.999939
Dgcr6	588.983	-0.0768505	0.597958	0.999939
Dgkd	63.0446	-0.013548	0.937864	0.999939
Dgkg	192.418	0.119983	0.456119	0.999939
Dgkh	867.443	0.141265	0.288053	0.999939
Dgkz	587.77	0.0749665	0.566094	0.999939
Dguok	201.752	-0.0847929	0.597373	0.999939
Dhdds	66.0767	0.00798627	0.963273	0.999939
Dhodh	74.5795	0.0157108	0.928259	0.999939
Dhps	117.813	-0.291725	0.0835465	0.999939
Dhrs1	133.63	-0.239753	0.146863	0.999939
Dhrs7	164.885	0.219348	0.171444	0.999939
Dhrs7b	217.465	-0.0543614	0.725318	0.999939
Dhx15	260.25	-0.109888	0.46788	0.999939
Dhx30	325.583	0.127784	0.371899	0.999939
Dhx32	355.673	0.0573241	0.70824	0.999939
Dhx33	99.7569	0.0129427	0.940282	0.999939
Dhx36	79.5644	-0.110675	0.524385	0.999939
Diablo	70.6841	-0.00381428	0.982537	0.999939
Diras1	130.599	-0.145404	0.401721	0.999939
Diras2	412.744	0.0875752	0.550947	0.999939
Dirc2	98.4201	-0.0429819	0.802522	0.999939
Dis3l	74.4361	0.156028	0.362965	0.999939
Dis3l2	75.918	0.0077961	0.964348	0.999939
Disp2	90.4919	-0.318436	0.0667203	0.999939
Dkc1	63.2517	0.00357633	0.983433	0.999939
Dkk3	70.2603	0.00315393	0.97594	0.999939
Dlat	170.179	0.00693139	0.96715	0.999939
Dld	300.028	0.0148827	0.918518	0.999939
Dlg1	212.99	-0.0433419	0.783495	0.999939
Dlg3	994.16	-0.0601152	0.636213	0.999939
Dlgap1	818.137	0.0835122	0.513471	0.999939
Dlgap2	108.924	0.149368	0.386453	0.999939
Dlgap3	61.9414	0.0859089	0.620137	0.999939
Dlgap4	183.515	0.0165862	0.921049	0.999939
Dlk2	69.9472	0.0551771	0.748895	0.999939
Dlst	140.735	-0.12433	0.448445	0.999939
Dmap1	97.2524	0.0971297	0.570688	0.999939
Dmrtc1a	85.6537	-0.274007	0.116357	0.999939
Dmtf1	102.657	0.164676	0.340612	0.999939
Dmtn	2107.86	0.185431	0.109617	0.999939
Dmwd	363.291	0.0388494	0.793753	0.999939
Dnaja1	549.126	-0.170805	0.221749	0.999939
Dnaja2	353.602	-0.00552184	0.968502	0.999939
Dnaja3	359.308	0.0254109	0.871063	0.999939
Dnaja4	127.656	0.163251	0.329242	0.999939
Dnajb1	147.765	0.028704	0.86012	0.999939
Dnajb11	200.302	-0.036272	0.817292	0.999939
Dnajb14	54.8846	0.0186894	0.908336	0.999939
Dnajb2	180.123	0.120515	0.45767	0.999939
Dnajb4	212.39	-0.0834538	0.615288	0.999939
Dnajb5	243.672	0.0208629	0.890203	0.999939
Dnajb6	385.262	0.0101358	0.942931	0.999939
Dnajc10	59.9656	0.0392257	0.821111	0.999939
Dnajc11	114.836	0.078446	0.646099	0.999939
Dnajc12	89.2613	0.331238	0.0548117	0.999939
Dnajc14	82.2744	-0.116175	0.504233	0.999939
Dnajc15	298.178	0.00165658	0.991717	0.999939
Dnajc19	238.775	0.074204	0.646286	0.999939
Dnajc2	91.3316	-0.0210489	0.903987	0.999939
Dnajc24	62.2753	0.127181	0.462272	0.999939
Dnajc27	61.5828	-0.0606497	0.724501	0.999939
Dnajc30	188.085	-0.0489255	0.757304	0.999939
Dnajc4	94.7922	0.0726085	0.67381	0.999939
Dnajc5	940.757	0.0110505	0.942753	0.999939
Dnajc6	203.114	-0.140254	0.403625	0.999939
Dnajc7	298.959	-0.118982	0.411381	0.999939
Dnajc8	360.665	-0.0198966	0.891051	0.999939
Dnajc9	118.964	-0.0140737	0.934949	0.999939
Dnal4	249.695	0.116726	0.43541	0.999939
Dner	90.3899	-0.107258	0.236261	0.999939
Dnlz	184.135	0.00620139	0.968701	0.999939
Dnm1	1432.89	0.0457902	0.753798	0.999939
Dnm1l	827.467	0.026476	0.831503	0.999939
Dnm2	132.644	0.231927	0.176329	0.999939
Dnmt1	86.1338	-0.13804	0.428844	0.999939
Dnpep	154.508	0.0732582	0.670822	0.999939
Dnttip1	149.312	-0.0417436	0.798011	0.999939
Dnttip2	95.9254	0.167882	0.331846	0.999939
Doc2a	63.5203	-0.0457447	0.792293	0.999939
Dock10	153.343	0.166718	0.320824	0.999939
Dock9	71.3526	-0.0615159	0.723969	0.999939
Dohh	270.719	0.0628251	0.683079	0.999939
Dok5	198.943	0.0783952	0.634766	0.999939
Dolk	61.0174	0.0652798	0.706335	0.999939
Dolpp1	140.618	0.152302	0.374847	0.999939
Dpcd	117.137	-0.154801	0.360197	0.999939
Dpf1	116.384	0.10026	0.550237	0.999939
Dpf2	160.747	0.176464	0.278558	0.999939
Dph1	76.0713	0.118207	0.497321	0.999939
Dph3	144.725	-0.12552	0.462037	0.999939
Dph6	57.4163	0.104093	0.543724	0.999939
Dpm1	317.849	0.200012	0.164199	0.999939
Dpm1-adnp	82.6896	0.121765	0.483238	0.999939
Dpm2	284.172	0.0523667	0.721179	0.999939
Dpm3	167.051	0.140089	0.40799	0.999939
Dpp3	70.3406	-0.189777	0.276608	0.999939
Dpp6	300.49	0.146175	0.324526	0.999939
Dpp9	57.7157	-0.00407131	0.980545	0.999939
Dpy30	571.888	-0.099489	0.452871	0.999939
Dpysl2	86.903	0.0999375	0.566262	0.999939
Dpysl4	100.561	0.0464559	0.78838	0.999939
Dr1	57.9438	0.0930068	0.585008	0.999939
Dram2	225.819	0.109032	0.474953	0.999939
Drap1	885.271	-0.0453742	0.751869	0.999939
Drg1	479.705	-0.0179668	0.903911	0.999939
Drg2	153.729	0.164993	0.327983	0.999939
Drosha	100.982	0.143729	0.406171	0.999939
Dscr3	62.3852	-0.116125	0.502783	0.999939
Dstn	415.015	0.0032551	0.98293	0.999939
Dtd1	523.743	-0.00580103	0.968215	0.999939
Dtna	557.43	-0.0378532	0.779371	0.999939
Dtnb	491.601	0.0933967	0.483278	0.999939
Dtnbp1	183.278	-0.228927	0.152315	0.999939
Dtwd1	79.7852	0.092146	0.595111	0.999939
Dtx1	90.1279	-0.209622	0.229029	0.999939
Dtx3	375.531	0.0546434	0.714893	0.999939
Dtymk	144.891	0.0170463	0.918547	0.999939
Dus1l	91.2653	-0.117874	0.497614	0.999939
Dus3l	145.104	0.0209655	0.899419	0.999939
Dusp14	395.531	-0.0467555	0.765657	0.999939
Dusp26	62.4366	-0.278259	0.109447	0.999939
Dusp28	58.3765	-0.111884	0.517814	0.999939
Dusp4	57.6802	-0.0245603	0.886448	0.999939
Dusp7	143.133	0.150812	0.367945	0.999939
Dusp8	89	0.123316	0.477109	0.999939
Dut	158.708	0.126568	0.435848	0.999939
Dvl1	195.55	-0.0738299	0.644982	0.999939
Dxo	108.325	0.216569	0.21072	0.999939
Dym	106.822	-0.00378223	0.982484	0.999939
Dync1i1	1190.73	-0.146543	0.269942	0.999939
Dync1i2	611.749	0.112615	0.388386	0.999939
Dync1li1	155.257	-0.160996	0.323753	0.999939
Dync1li2	91.8112	-0.133824	0.442209	0.999939
Dync2li1	90.6032	-0.0170674	0.921419	0.999939
Dynll1	1486.66	0.125631	0.369012	0.999939
Dynll2	221.837	-0.276657	0.112402	0.999939
Dynlrb1	3736.66	-0.145657	0.261842	0.999939
Dynlt3	335.909	-0.104334	0.525319	0.999939
Dyrk1a	65.9932	0.033545	0.847194	0.999939
Dyrk1b	95.0055	-0.161602	0.346701	0.999939
Dyrk3	65.5075	-0.0219455	0.899027	0.999939
Dzip3	71.3143	0.13767	0.428698	0.999939
E130309D02Rik	62.1276	-0.153577	0.376302	0.999939
E2f4	97.4849	0.162167	0.34644	0.999939
E2f6	91.7915	-0.205104	0.237464	0.999939
E4f1	110.367	-0.00841495	0.960578	0.999939
Eapp	134.959	0.11716	0.492503	0.999939
Ebag9	85.5188	-0.147239	0.395568	0.999939
Ebna1bp2	110.623	-0.0883222	0.60114	0.999939
Ebp	79.4438	0.200322	0.250371	0.999939
Ecd	74.6946	0.00648561	0.970325	0.999939
Ece2	112.232	-0.210213	0.219079	0.999939
Ech1	288.227	-0.143062	0.349799	0.999939
Echdc1	107.498	0.230072	0.174761	0.999939
Echs1	218.881	0.0750405	0.630758	0.999939
Eci1	59.454	-0.197871	0.242366	0.999939
Eci2	179.167	-0.0835313	0.614677	0.999939
Ecsit	560.734	0.00419564	0.974557	0.999939
Edc3	56.79	0.0493284	0.774327	0.999939
Edc4	142.596	-0.0320414	0.849177	0.999939
Edem2	73.2162	0.0525335	0.76326	0.999939
Edf1	865.135	-0.0198079	0.882869	0.999939
Edil3	103.129	-0.245614	0.150716	0.999939
Eef1a1	1608.9	0.0911558	0.452127	0.999939
Eef1b2	216.099	-0.0183457	0.9096	0.999939
Eef1d	467.5	0.0624574	0.644497	0.999939
Eef1e1	196.091	-0.10558	0.504494	0.999939
Eef1g	197.362	-0.0236173	0.883979	0.999939
Eef2	376.765	0.0769213	0.583874	0.999939
Eef2k	68.7033	-0.00300934	0.986242	0.999939
Efhd2	477.751	-0.0646111	0.657068	0.999939
Efna1	56.8161	0.00134775	0.993555	0.999939
Efna3	124.118	0.140949	0.397869	0.999939
Efnb3	161.909	0.121365	0.451956	0.999939
Efr3a	83.1927	-0.0852162	0.624524	0.999939
Eftud2	374.852	-0.0866037	0.537048	0.999939
Egfl7	267.995	0.17238	0.281869	0.999939
Egln1	114.868	0.142789	0.396201	0.999939
Egln2	158.275	-0.0693101	0.668361	0.999939
Egr1	190.987	-0.0638912	0.708673	0.999939
Egr4	107.82	-0.119579	0.493131	0.999939
Ehbp1l1	69.9179	-0.0139641	0.934469	0.999939
Ehd1	297.874	0.246688	0.110187	0.999939
Ehd3	470.895	0.118815	0.383883	0.999939
Ehmt1	127.29	-0.00838686	0.961145	0.999939
Ehmt2	152.049	-0.14521	0.380564	0.999939
Ei24	335.479	0.0920798	0.536877	0.999939
Eid1	528.722	0.0911164	0.495886	0.999939
Eid2	302.775	-0.0535401	0.713377	0.999939
Eif1	2311.19	0.0873821	0.45678	0.999939
Eif1a	77.6263	0.0960487	0.582053	0.999939
Eif1ad	62.9574	0.191744	0.269281	0.999939
Eif1ax	186.299	-0.0499561	0.752287	0.999939
Eif1b	1020.08	-0.0613481	0.619752	0.999939
Eif2a	69.6832	-0.121206	0.486012	0.999939
Eif2ak1	139.331	0.0685756	0.678102	0.999939
Eif2b1	95.0418	-0.0122347	0.943482	0.999939
Eif2b2	93.7484	0.0270409	0.875369	0.999939
Eif2b4	373.374	-0.00622972	0.965595	0.999939
Eif2b5	134.15	-0.136251	0.41684	0.999939
Eif2d	136.464	0.162026	0.33009	0.999939
Eif2s1	102.373	-0.178436	0.29827	0.999939
Eif2s2	89.6507	-0.0144512	0.933216	0.999939
Eif3a	92.098	-0.0371254	0.829394	0.999939
Eif3b	164.018	-0.215154	0.182873	0.999939
Eif3c	208.705	-0.116139	0.46083	0.999939
Eif3d	189.606	0.0631101	0.689603	0.999939
Eif3e	274.681	0.049507	0.740108	0.999939
Eif3f	121.752	0.107345	0.521583	0.999939
Eif3g	413.003	0.026357	0.85022	0.999939
Eif3h	315.975	0.0106865	0.941634	0.999939
Eif3i	353.09	-0.132763	0.35086	0.999939
Eif3k	1014.11	-0.028214	0.817812	0.999939
Eif3l	208.486	-0.0843194	0.59798	0.999939
Eif3m	300.941	0.196084	0.192995	0.999939
Eif4a1	834.611	0.222615	0.0890339	0.999939
Eif4a2	2081.37	-0.0174135	0.88128	0.999939
Eif4b	124.182	0.149423	0.375316	0.999939
Eif4e	276.159	-0.00747903	0.960599	0.999939
Eif4e2	71.3861	0.0407519	0.814562	0.999939
Eif4enif1	177.456	0.094167	0.576328	0.999939
Eif4g1	140.924	-0.094613	0.576169	0.999939
Eif4g2	473.704	-0.0767026	0.564496	0.999939
Eif4g3	187.295	0.0689759	0.68536	0.999939
Eif4h	886.662	0.0576946	0.651343	0.999939
Eif5	530.415	0.0529287	0.693773	0.999939
Eif5a	11043.9	0.0765287	0.537016	0.999939
Eif6	196.432	0.146288	0.353447	0.999939
Elavl1	78.656	-0.113165	0.515577	0.999939
Elavl2	87.0798	-0.235437	0.0293946	0.999939
Elavl4	98.1569	-0.074983	0.390881	0.999939
Elk1	183.693	0.158781	0.314583	0.999939
Elmo2	1672.15	-0.0122738	0.932474	0.999939
Elmod1	735.265	0.169935	0.18785	0.999939
Elmod3	137.335	-0.123543	0.456747	0.999939
Elof1	201.604	-0.11082	0.480096	0.999939
Elovl4	93.3314	0.0124375	0.942276	0.999939
Elp2	189.506	0.0912923	0.561737	0.999939
Elp3	395.759	0.0966589	0.498069	0.999939
Elp5	438.395	0.0301295	0.825377	0.999939
Emc1	162.023	-0.161593	0.322097	0.999939
Emc10	534.275	0.12679	0.339039	0.999939
Emc2	246.286	0.00168018	0.991475	0.999939
Emc3	219.621	-0.0968316	0.53065	0.999939
Emc4	533.949	-0.0632902	0.658089	0.999939
Emc6	377.177	-0.154868	0.301609	0.999939
Emc7	340.561	-0.0976078	0.51738	0.999939
Emc8	64.4974	-0.00963917	0.955781	0.999939
Emc9	154.692	-0.169249	0.308487	0.999939
Emg1	233.294	0.0980807	0.533613	0.999939
Eml1	157.888	0.213282	0.1869	0.999939
Eml2	152.579	-0.282769	0.0936827	0.999939
Eml4	125.803	0.129175	0.459129	0.999939
Enc1	70.0781	0.0636534	0.714157	0.999939
Endog	172.653	-0.0476988	0.776931	0.999939
Eno1	1164.78	-0.163277	0.223117	0.999939
Eno1b	602.912	-0.157984	0.263649	0.999939
Eno2	2274.6	0.0783695	0.467871	0.999939
Enoph1	341.659	-0.13277	0.37682	0.999939
Enox1	116.313	-0.13019	0.453146	0.999939
Enox2	56.3976	0.0331579	0.836713	0.999939
Enpp2	90.7961	-0.283862	0.0975085	0.999939
Enpp5	512.239	-0.292889	0.0353747	0.999939
Ensa	691.773	0.177221	0.189113	0.999939
Entpd5	58.7673	-0.171911	0.305682	0.999939
Entpd6	149.243	0.0785247	0.641039	0.999939
Eny2	108.997	0.151997	0.381301	0.999939
Epb4.1l1	233.423	0.159022	0.343423	0.999939
Epb4.1l3	63.967	-0.222238	0.201497	0.999939
Epdr1	334.283	-0.202439	0.206403	0.999939
Epha4	172.629	0.171886	0.31026	0.999939
Epha7	833.632	0.18669	0.180077	0.999939
Ephb6	116.601	0.239763	0.158274	0.999939
Ephx2	59.3954	-0.100152	0.536218	0.999939
Ephx4	277.294	0.150997	0.361119	0.999939
Epm2aip1	58.246	-0.0772092	0.653273	0.999939
Epn1	115.975	0.251385	0.139715	0.999939
Epn2	426.841	-0.0110478	0.939657	0.999939
Eprs	78.9737	-0.00388939	0.982156	0.999939
Eps15	141.709	0.0405593	0.815854	0.999939
Eps8	126.091	-0.0764646	0.336063	0.999939
Erbb2ip	60.0832	-0.0791489	0.647887	0.999939
Erc2	110.809	-0.00937732	0.955843	0.999939
Ercc1	174.634	0.12683	0.444072	0.999939
Erdr1	57.0575	0.019151	0.903521	0.999939
Ergic1	148.412	-0.111677	0.501413	0.999939
Ergic2	153.416	0.00501988	0.975353	0.999939
Ergic3	325.914	-0.110532	0.464576	0.999939
Erh	462.009	-0.0415695	0.767163	0.999939
Eri3	1977.06	-0.117134	0.307281	0.999939
Erlin1	101.803	-0.148067	0.396101	0.999939
Erlin2	54.3614	0.0247193	0.883982	0.999939
Ermp1	61.8037	-0.0132786	0.939002	0.999939
Erp29	217.565	0.0220715	0.886469	0.999939
Erp44	78.3905	0.105342	0.545065	0.999939
Errfi1	89.6306	0.0109178	0.950115	0.999939
Esd	450.486	-0.0932589	0.50729	0.999939
Etf1	59.3554	0.00318985	0.985235	0.999939
Etfa	153.171	0.15108	0.353127	0.999939
Etfb	482.556	-0.0705042	0.614995	0.999939
Etfdh	59.1672	-0.14383	0.40311	0.999939
Etnk1	85.8637	-0.069155	0.691462	0.999939
Ets2	172.092	-0.0355168	0.827291	0.999939
Evl	416.756	0.0235067	0.878847	0.999939
Ewsr1	1216.68	0.208122	0.0830465	0.999939
Exd2	100.315	0.10367	0.546167	0.999939
Exoc1	169.53	0.236315	0.140963	0.999939
Exoc3	68.3616	0.0615204	0.723882	0.999939
Exoc4	56.9338	-0.0739643	0.663564	0.999939
Exoc5	80.2105	-0.00577477	0.973509	0.999939
Exoc6	97.9996	0.093935	0.583386	0.999939
Exoc7	237.325	-0.0379507	0.804552	0.999939
Exog	72.2537	-0.17512	0.315475	0.999939
Exosc1	168.304	0.0340044	0.836942	0.999939
Exosc10	231.425	0.20939	0.194576	0.999939
Exosc2	70.2526	0.0861049	0.621662	0.999939
Exosc3	74.2206	-0.0599694	0.730994	0.999939
Exosc4	170.546	0.1234	0.440903	0.999939
Exosc5	114.709	-0.271607	0.107868	0.999939
Exosc6	98.4944	0.180807	0.294356	0.999939
Exosc7	128.607	0.0350731	0.839105	0.999939
Exosc8	180.262	-0.0112356	0.943465	0.999939
Exosc9	122.038	0.0742528	0.663348	0.999939
Ext2	76.022	0.00964699	0.955904	0.999939
Extl1	68.1692	0.272424	0.117503	0.999939
Extl2	610.034	0.146008	0.264877	0.999939
Ezh1	114.468	0.214862	0.215186	0.999939
Faah	348.534	0.102731	0.465611	0.999939
Faap20	163.681	-0.168994	0.292713	0.999939
Fabp3	251.346	-0.273827	0.0732297	0.999939
Fabp5	969.272	-0.118765	0.390928	0.999939
Fabp7	111.406	-0.371561	0.0308963	0.999939
Fads1	171.012	-0.21038	0.188476	0.999939
Fads2	106.706	-0.187746	0.279928	0.999939
Faf2	61.7523	-0.0145303	0.933141	0.999939
Fahd1	87.0668	-0.191794	0.271621	0.999939
Faim	326.757	-0.0940872	0.508452	0.999939
Faim2	973.777	0.151221	0.224159	0.999939
Fam102a	90.2231	0.0388289	0.82198	0.999939
Fam103a1	231.097	0.0980862	0.526728	0.999939
Fam104a	136.381	-0.0303208	0.854092	0.999939
Fam105a	150.882	0.0328868	0.84167	0.999939
Fam110a	58.0615	0.0772622	0.634924	0.999939
Fam110b	138.452	-0.0540773	0.754262	0.999939
Fam114a2	329.719	-0.0662505	0.6719	0.999939
Fam117b	68.4444	0.042981	0.80481	0.999939
Fam118a	79.4348	0.153699	0.377325	0.999939
Fam118b	198.142	-0.146702	0.385937	0.999939
Fam120a	58.5688	-0.0417613	0.808615	0.999939
Fam120aos	85.1699	-0.0297419	0.863747	0.999939
Fam120b	106.187	-0.0969389	0.571817	0.999939
Fam122a	122.224	0.14232	0.400959	0.999939
Fam131a	1459.57	0.194284	0.0980677	0.999939
Fam131b	74.7728	-0.20207	0.246855	0.999939
Fam134a	1272.01	0.174011	0.128554	0.999939
Fam134b	225.238	-0.173381	0.312356	0.999939
Fam134c	66.1847	0.115163	0.508069	0.999939
Fam136a	172.469	-0.118734	0.462467	0.999939
Fam13c	375.991	0.112745	0.469588	0.999939
Fam149b	72.9553	-0.241541	0.166206	0.999939
Fam160a2	97.9296	0.180573	0.297842	0.999939
Fam162a	443.15	-0.0800609	0.607577	0.999939
Fam163b	1709.24	0.153093	0.177912	0.999939
Fam168a	59.9347	0.00780754	0.964047	0.999939
Fam168b	407.847	-0.121127	0.403603	0.999939
Fam169a	93.4613	-0.044394	0.798528	0.999939
Fam171a1	116.018	-0.0566384	0.738165	0.999939
Fam171b	368.952	-0.111942	0.432915	0.999939
Fam172a	164.907	-0.00673735	0.967093	0.999939
Fam173a	808.927	-0.010197	0.935557	0.999939
Fam174a	282.177	0.101177	0.498619	0.999939
Fam174b	73.375	-0.175865	0.313564	0.999939
Fam183b	192.195	-0.0577214	0.670935	0.999939
Fam188a	205.248	0.135108	0.399098	0.999939
Fam192a	122.221	0.15938	0.348338	0.999939
Fam195a	72.2162	0.000872223	0.995987	0.999939
Fam195b	360.17	-0.0941156	0.526989	0.999939
Fam19a2	606.268	0.0533969	0.70113	0.999939
Fam19a5	258.439	-0.25357	0.134119	0.999939
Fam204a	81.9035	0.0242822	0.888889	0.999939
Fam207a	84.6562	-0.0559448	0.748198	0.999939
Fam21	71.6127	0.0861551	0.621455	0.999939
Fam212b	214.382	0.0829648	0.589513	0.999939
Fam213a	363.613	-0.0128538	0.927834	0.999939
Fam213b	298.553	-0.322851	0.030244	0.999939
Fam214a	98.2498	0.0350545	0.840569	0.999939
Fam214b	76.4896	-0.388421	0.0259397	0.999939
Fam216a	590.863	0.042135	0.766398	0.999939
Fam220a	67.0961	-0.00034873	0.998393	0.999939
Fam222b	81.6951	0.087016	0.616008	0.999939
Fam229b	57.9401	-0.087597	0.611181	0.999939
Fam32a	263.617	0.0422733	0.781703	0.999939
Fam3c	202.862	0.116503	0.46223	0.999939
Fam43b	105.604	-0.0293708	0.864202	0.999939
Fam45a	187.953	-0.303458	0.0552743	0.999939
Fam49a	338.535	-0.0943371	0.515277	0.999939
Fam49b	156.867	0.0455256	0.790352	0.999939
Fam50a	101.283	-0.0263105	0.879878	0.999939
Fam53a	100.908	-0.0448888	0.792251	0.999939
Fam53b	76.3135	0.169125	0.327559	0.999939
Fam53c	76.4385	0.0278059	0.873329	0.999939
Fam58b	63.0556	-0.0669284	0.699962	0.999939
Fam65a	76.0729	0.0409284	0.81423	0.999939
Fam65b	84.8867	-0.0728436	0.675074	0.999939
Fam69a	99.8229	0.0974619	0.568753	0.999939
Fam69b	237.042	-0.167722	0.307118	0.999939
Fam73a	96.8898	-0.00442917	0.979497	0.999939
Fam73b	139.426	0.0177912	0.914847	0.999939
Fam76a	169.652	0.0542794	0.73615	0.999939
Fam81a	86.0538	0.193567	0.264057	0.999939
Fam84a	383.858	0.135514	0.366047	0.999939
Fam84b	81.0336	0.114614	0.510505	0.999939
Fam89b	175.187	0.0156973	0.923553	0.999939
Fam92a	236.33	-0.0800699	0.604028	0.999939
Fam96a	112.723	0.045534	0.78907	0.999939
Fam96b	176.484	0.0136471	0.93186	0.999939
Fam98c	119.586	-0.207826	0.218045	0.999939
Fance	196.245	-0.157776	0.34877	0.999939
Fancl	64.7718	-0.0388079	0.821954	0.999939
Far1	94.0646	-0.120746	0.483553	0.999939
Fars2	98.9489	-0.24133	0.158744	0.999939
Farsa	113.073	0.101919	0.550954	0.999939
Farsb	570.51	0.193768	0.16061	0.999939
Fastk	212.13	-0.158247	0.311658	0.999939
Fastkd5	61.6943	0.386923	0.0247643	0.999939
Fau	481.183	0.0414329	0.781878	0.999939
Fbl	61.9888	-0.106417	0.539279	0.999939
Fbxl12	57.7335	0.216463	0.184192	0.999939
Fbxl15	120.587	-0.0751189	0.653374	0.999939
Fbxl16	579.038	0.268686	0.0519283	0.999939
Fbxl3	70.1727	0.1735	0.320093	0.999939
Fbxl4	106.266	0.11387	0.505372	0.999939
Fbxl5	228.355	0.109198	0.473109	0.999939
Fbxl6	126.035	0.317192	0.0593152	0.999939
Fbxo18	59.4746	-0.147087	0.389263	0.999939
Fbxo2	62.9452	-0.19111	0.239959	0.999939
Fbxo21	228.164	-0.0930329	0.549295	0.999939
Fbxo25	188.283	0.111539	0.496016	0.999939
Fbxo27	93.7876	0.0597757	0.731885	0.999939
Fbxo3	73.9535	-0.118427	0.497062	0.999939
Fbxo31	169.83	0.110652	0.488154	0.999939
Fbxo33	81.1082	0.124737	0.474745	0.999939
Fbxo34	741.716	0.180051	0.175895	0.999939
Fbxo41	133.195	-0.066013	0.696426	0.999939
Fbxo44	499.906	-0.0156504	0.922057	0.999939
Fbxo45	84.2275	0.08028	0.643473	0.999939
Fbxo6	177.26	0.074105	0.6592	0.999939
Fbxo9	531.789	-0.0418534	0.756293	0.999939
Fbxw11	943.89	-0.0830925	0.59276	0.999939
Fbxw2	312.346	0.116912	0.416781	0.999939
Fbxw5	196.01	-0.029413	0.860127	0.999939
Fbxw7	340.532	-0.0781311	0.624507	0.999939
Fcer1g	81.1909	0.115967	0.500729	0.999939
Fcf1	195.111	0.163261	0.296338	0.999939
Fcho1	151.849	0.193836	0.250037	0.999939
Fdft1	54.3026	-0.0896185	0.585171	0.999939
Fdps	351.83	0.0207349	0.884169	0.999939
Fdx1l	236.759	0.031635	0.838916	0.999939
Fech	138.352	0.0883422	0.597904	0.999939
Fen1	149.348	0.25798	0.131846	0.999939
Fez1	1228.72	-0.0865101	0.477764	0.999939
Fez2	107.769	0.0577457	0.734298	0.999939
Fgf13	1220.43	0.192553	0.0942142	0.999939
Fgf14	55.6093	-0.158877	0.353402	0.999939
Fgfr1	80.1516	-0.171415	0.317139	0.999939
Fgfr1op2	157.803	0.181699	0.26141	0.999939
Fgfr3	112.757	-0.0494475	0.678798	0.999939
Fh1	247.491	0.118843	0.437846	0.999939
Fhl1	259.182	0.021631	0.890909	0.999939
Fhl2	144.994	-0.0573326	0.735907	0.999939
Fibp	251.678	0.130053	0.398643	0.999939
Fig4	82.7193	0.0505988	0.770659	0.999939
Fip1l1	194.676	-0.215794	0.180741	0.999939
Fis1	981.157	-0.0623608	0.604773	0.999939
Fiz1	137.997	-0.0403417	0.815988	0.999939
Fjx1	129.002	-0.297658	0.0820956	0.999939
Fkbp1a	13441.5	0.197135	0.102257	0.999939
Fkbp1b	58.0011	-0.194297	0.245337	0.999939
Fkbp2	748.188	-0.190997	0.124191	0.999939
Fkbp3	963.122	-0.119185	0.405031	0.999939
Fkbp4	359.556	-0.0861641	0.544121	0.999939
Fkbp5	89.837	0.268375	0.121387	0.999939
Fkbp8	1674.68	-0.0571212	0.666033	0.999939
Fkrp	73.3063	0.0280073	0.872463	0.999939
Flad1	82.0058	-0.0990218	0.568309	0.999939
Flcn	299.815	-0.195483	0.245742	0.999939
Flot1	197.017	-0.13525	0.391024	0.999939
Flot2	516.769	-0.0861032	0.515951	0.999939
Flrt3	169.275	-0.000316895	0.998491	0.999939
Flywch1	301.546	-0.0375493	0.802591	0.999939
Flywch2	159.733	-0.0372267	0.820006	0.999939
Fmnl1	92.214	0.386205	0.0265381	0.999939
Fmr1	137.606	0.0782446	0.643518	0.999939
Fnbp1	67.5185	0.0648091	0.710004	0.999939
Fndc4	179.963	-0.0200744	0.899779	0.999939
Fndc5	104.436	-0.211189	0.225852	0.999939
Fnta	121.994	-0.106774	0.525897	0.999939
Fopnl	347.987	0.0560498	0.701547	0.999939
Foxg1	139.529	0.0654151	0.690849	0.999939
Foxj3	97.7919	0.00164602	0.992403	0.999939
Foxo1	83.3744	0.161663	0.354139	0.999939
Foxred1	186.353	-0.057958	0.724153	0.999939
Fra10ac1	115.785	0.0560698	0.743538	0.999939
Frg1	207.693	0.220476	0.163316	0.999939
Frmd4a	55.0509	0.0501647	0.756178	0.999939
Frrs1l	382.179	0.111337	0.4511	0.999939
Fscn1	92.4999	0.0484915	0.779719	0.999939
Fsd1	110.823	-0.155487	0.358645	0.999939
Fst	81.9759	-0.0630493	0.576295	0.999939
Fstl4	75.6335	0.178626	0.306002	0.999939
Fth1	17700	0.0544362	0.638088	0.999939
Ftl1	1135.73	-0.0143092	0.918711	0.999939
Fto	204.837	-0.120708	0.446654	0.999939
Fubp3	67.4765	0.276384	0.112997	0.999939
Fundc1	148.424	0.185348	0.260229	0.999939
Fundc2	58.8853	-0.0344027	0.842131	0.999939
Fuom	153.128	-0.132877	0.427943	0.999939
Fus	88.4759	0.0198239	0.909059	0.999939
Fut8	371.087	0.0355394	0.817293	0.999939
Fxr1	95.4711	-0.264822	0.124055	0.999939
Fxr2	124.798	-0.0768709	0.65031	0.999939
Fxyd6	177.846	-0.127315	0.352257	0.999939
Fxyd7	94.3802	-0.108155	0.253852	0.999939
Fyn	779.628	0.0487352	0.690714	0.999939
Fyttd1	250.888	-0.00128255	0.99341	0.999939
Fzr1	219.371	-0.129318	0.429498	0.999939
G3bp1	170.985	0.0893439	0.575418	0.999939
G3bp2	1229.55	0.0320336	0.805704	0.999939
Gaa	503.543	-0.137244	0.352233	0.999939
Gabarap	520.05	0.0557831	0.708589	0.999939
Gabarapl1	1434.78	-0.0781048	0.550806	0.999939
Gabarapl2	486.085	-0.0825344	0.559765	0.999939
Gabbr1	186.309	-0.0640142	0.70243	0.999939
Gabbr2	203.657	-0.146863	0.374051	0.999939
Gabpb1	93.1265	0.0109802	0.949714	0.999939
Gabra1	256.244	-0.0167331	0.914762	0.999939
Gabra4	278.752	0.189177	0.19988	0.999939
Gabra5	553.279	0.140103	0.322178	0.999939
Gabrb1	196.146	0.0493339	0.767133	0.999939
Gabrb2	82.774	0.0528615	0.761947	0.999939
Gabrb3	498.377	0.0752932	0.592507	0.999939
Gabrd	153.317	-0.025482	0.877929	0.999939
Gabrg2	823.651	0.0578512	0.71766	0.999939
Gad1	434.517	-0.217497	0.154551	0.999939
Gad2	56.3055	-0.11251	0.149881	0.999939
Gadd45b	56.9021	-0.333411	0.0517465	0.999939
Gadd45g	278.978	-0.239691	0.114544	0.999939
Gadd45gip1	172.267	-0.0650207	0.683697	0.999939
Gak	241.536	-0.135435	0.419558	0.999939
Gal3st3	106.065	0.188012	0.27649	0.999939
Galns	74.1239	0.203386	0.243489	0.999939
Galnt1	98.8032	-0.0743697	0.663255	0.999939
Galnt11	75.6075	-0.102811	0.555588	0.999939
Galnt16	102.786	0.130636	0.448754	0.999939
Galnt18	166.677	0.200432	0.229718	0.999939
Galnt2	93.6457	-0.1707	0.326445	0.999939
Galnt9	157.006	-0.302958	0.0767461	0.999939
Galt	112.859	-0.00215929	0.989923	0.999939
Ganab	172.916	-0.210267	0.193414	0.999939
Gap43	140.82	-0.154465	0.11215	0.999939
Gapdh	3278.23	-0.00236531	0.982299	0.999939
Gar1	77.4094	-0.046257	0.790957	0.999939
Gars	297.603	0.155075	0.301926	0.999939
Gas2l1	159.265	-0.146467	0.38201	0.999939
Gas5	158.265	0.110839	0.518888	0.999939
[truncated: 4,092 more rows]
