# Supplementary figures and images for: Exercise-induced enhancement of synaptic function triggered by the inverse BAR protein, Mtss1L
Source: eLife journal article supplement (doi:10.7554/elife.45920), 2019-06-24

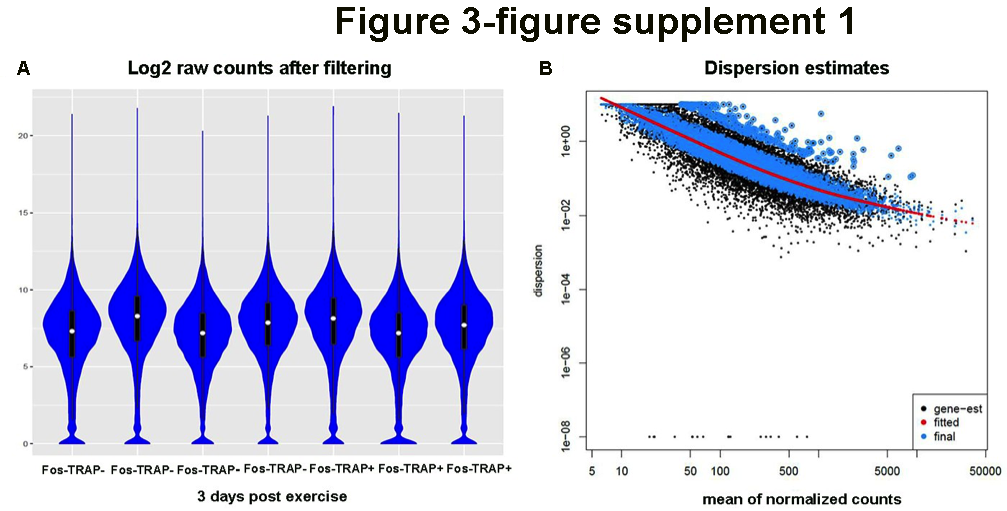

Supplement: supp [file elife-45920-supp-v1.zip › elife_poa_e45920_Figure_3_figure_supplement_1.tif]

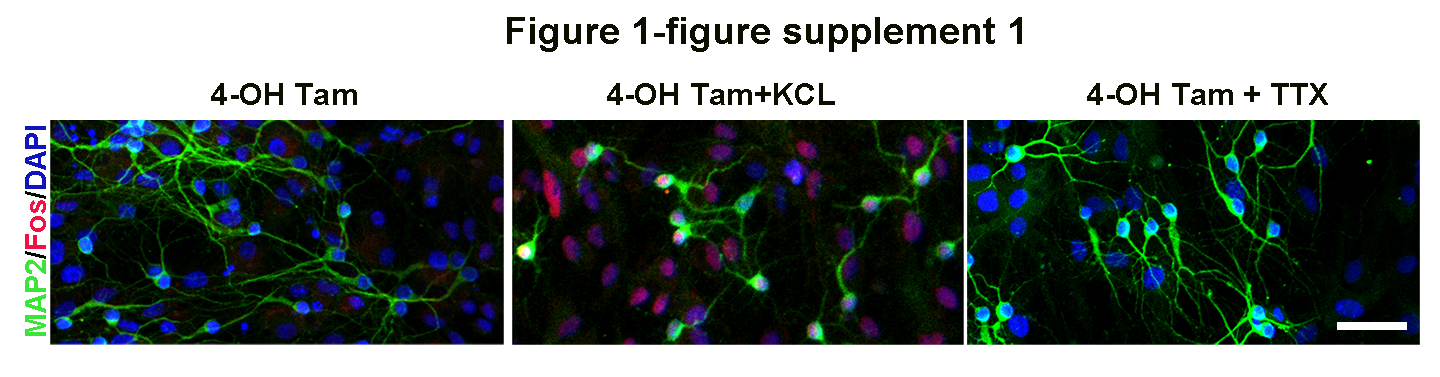

Supplement: supp [file elife-45920-supp-v1.zip › elife_poa_e45920_Figure_1_figure_supplement_1.tif]

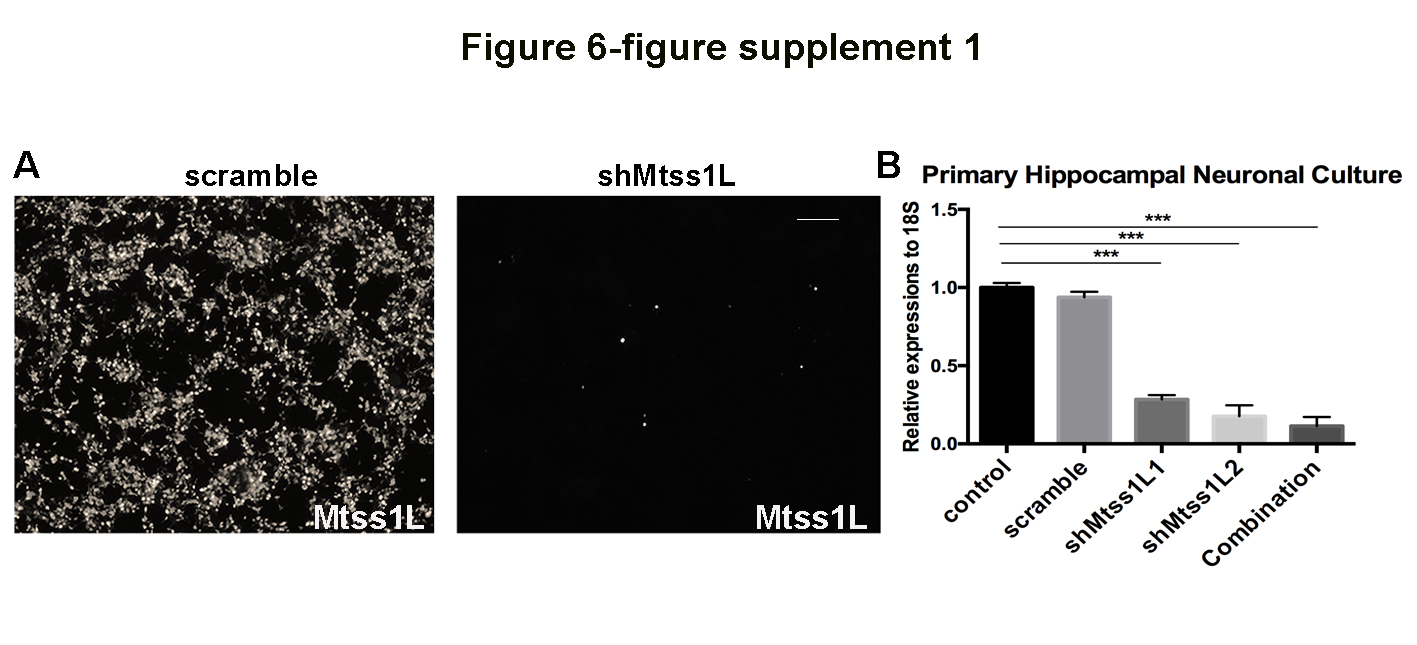

Supplement: supp [file elife-45920-supp-v1.zip › elife_poa_e45920_Figure_6_figure_supplement_1.tif]

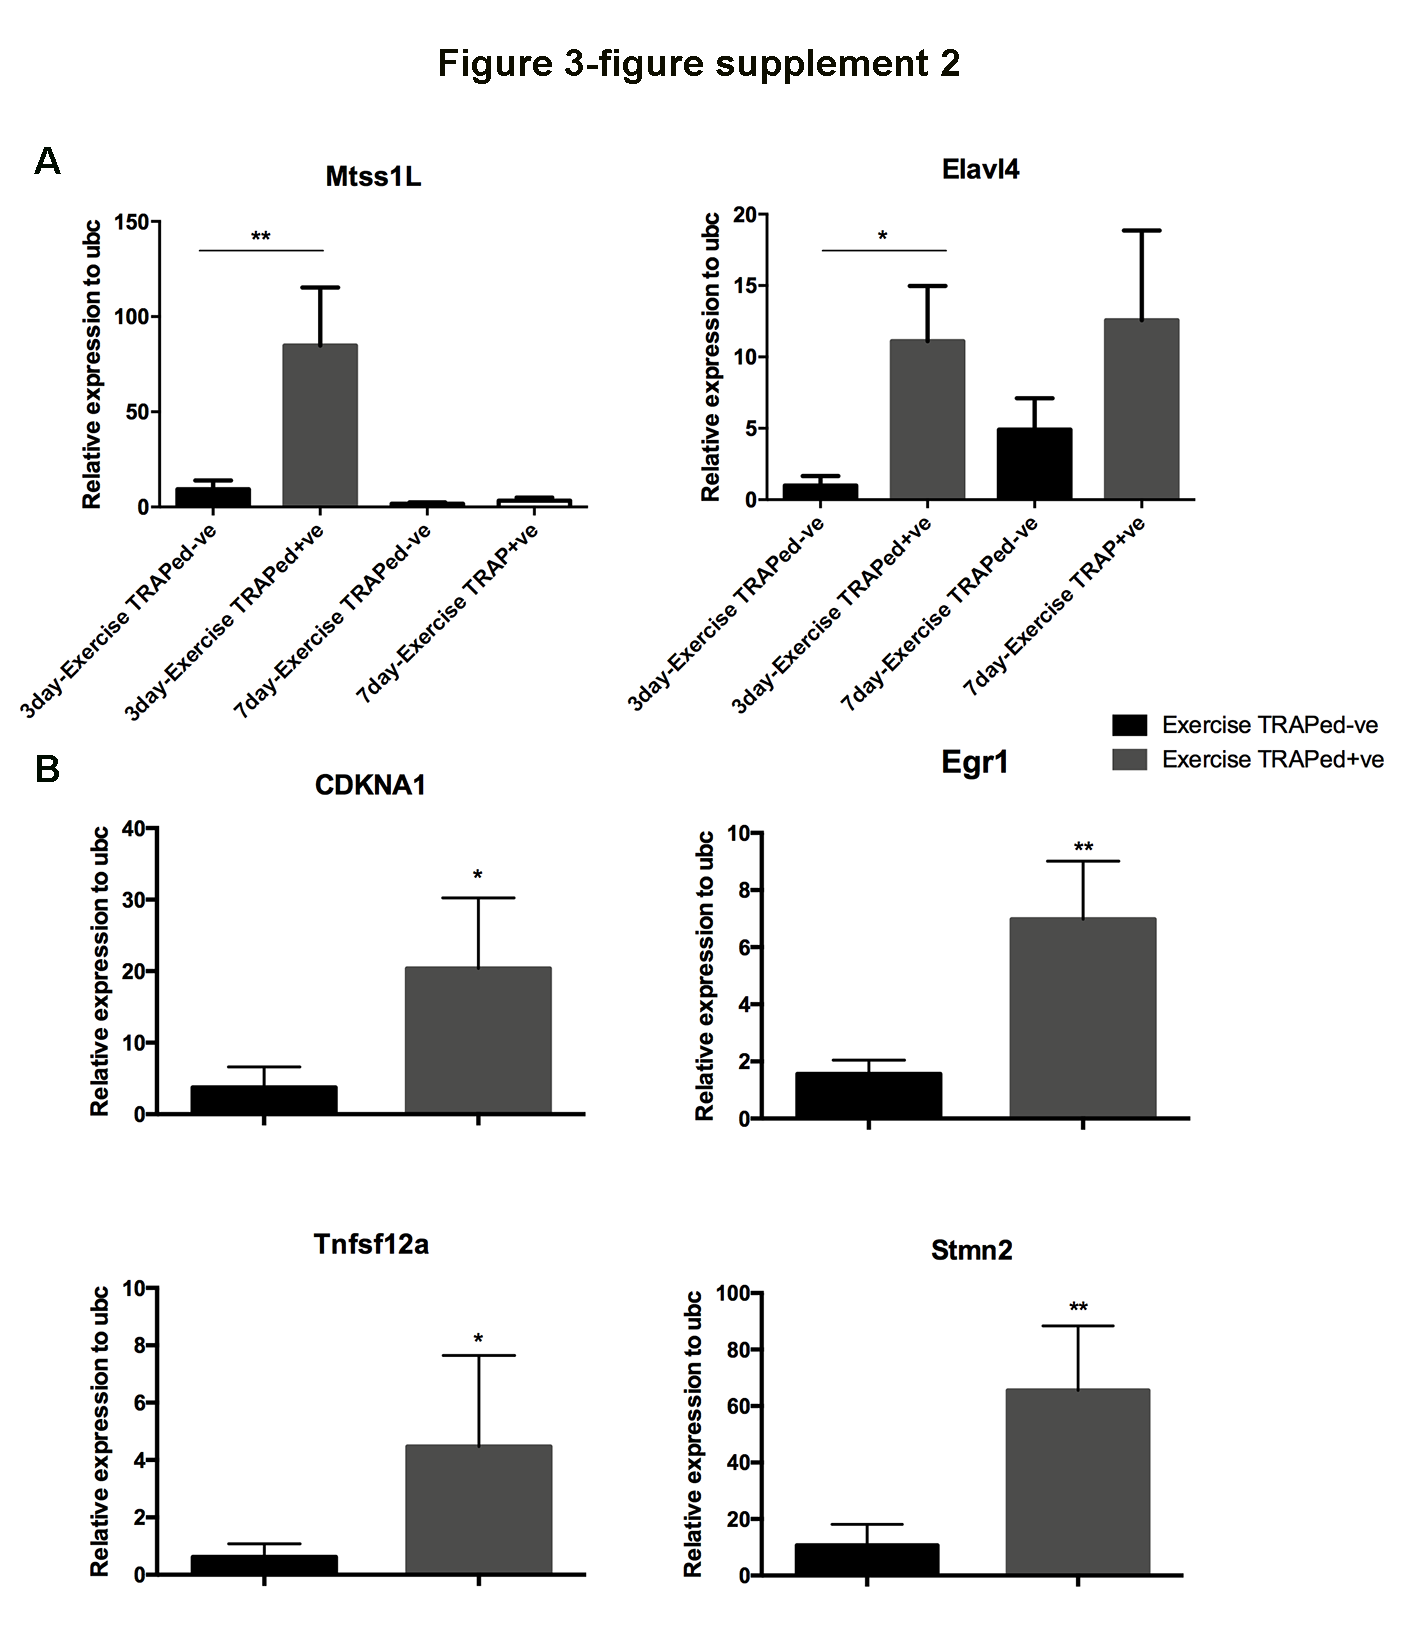

Supplement: supp [file elife-45920-supp-v1.zip › elife_poa_e45920_Figure_3_figure_supplement_2.tif]
